# Supplementary material
Source: PubMed Central journal article supplement (PMC3367329)

# Modified Routes to the “Designer” Surfactant PQS

## Supporting Information

Ralph Moser, Subir Ghorai, and Bruce H. Lipshutz\*

Department of Chemistry and Biochemistry  
University of California, Santa Barbara, CA 93106  
lipshutz@chem.uscb.edu

### Table of Contents

|      |                                                                                             |         |
|------|---------------------------------------------------------------------------------------------|---------|
| I.   | Spectral comparison of PQS-1 ( <b>1</b> ) obtained through Route <b>A</b> vs Route <b>B</b> | S2-S3   |
| II.  | Mass spectral data of PQS-3 ( <b>3</b> )                                                    | S4-S9   |
| III. | Spectral data ( $^1\text{H}$ and $^{13}\text{C}$ ) of all new compounds                     | S10-S27 |

# I. Spectral comparison of PQS-1 (1) obtained through Route A vs Route B

Spectral data:

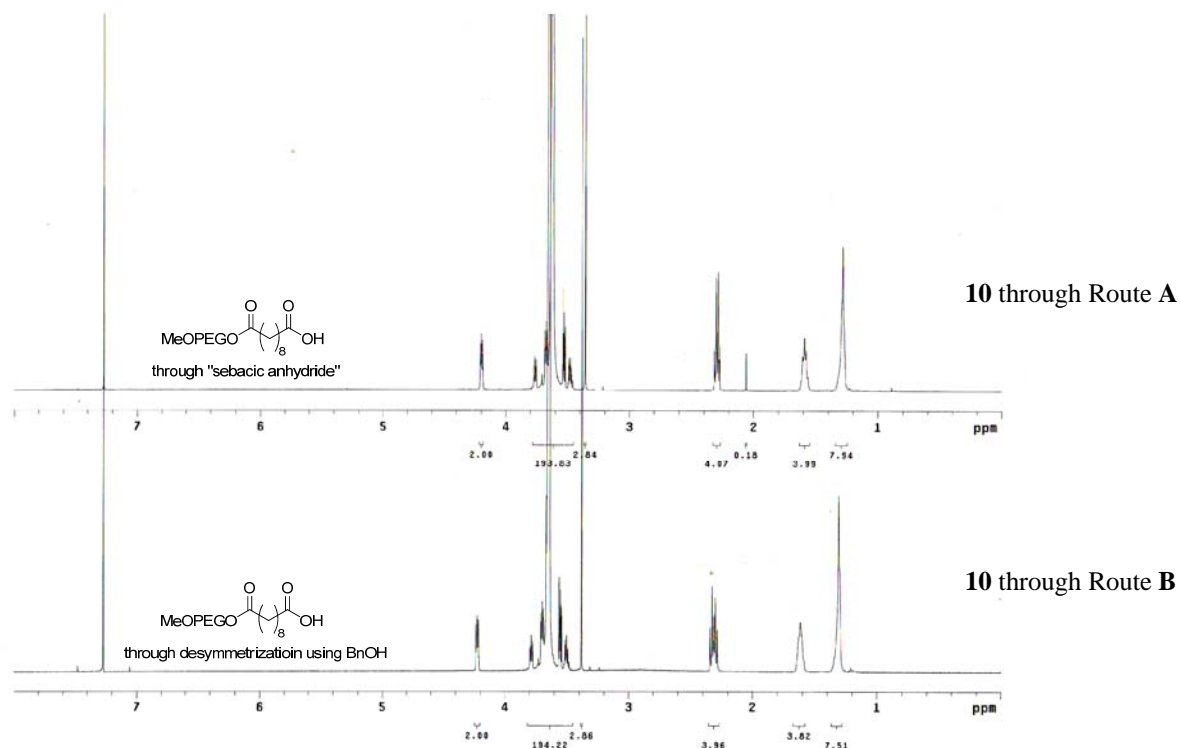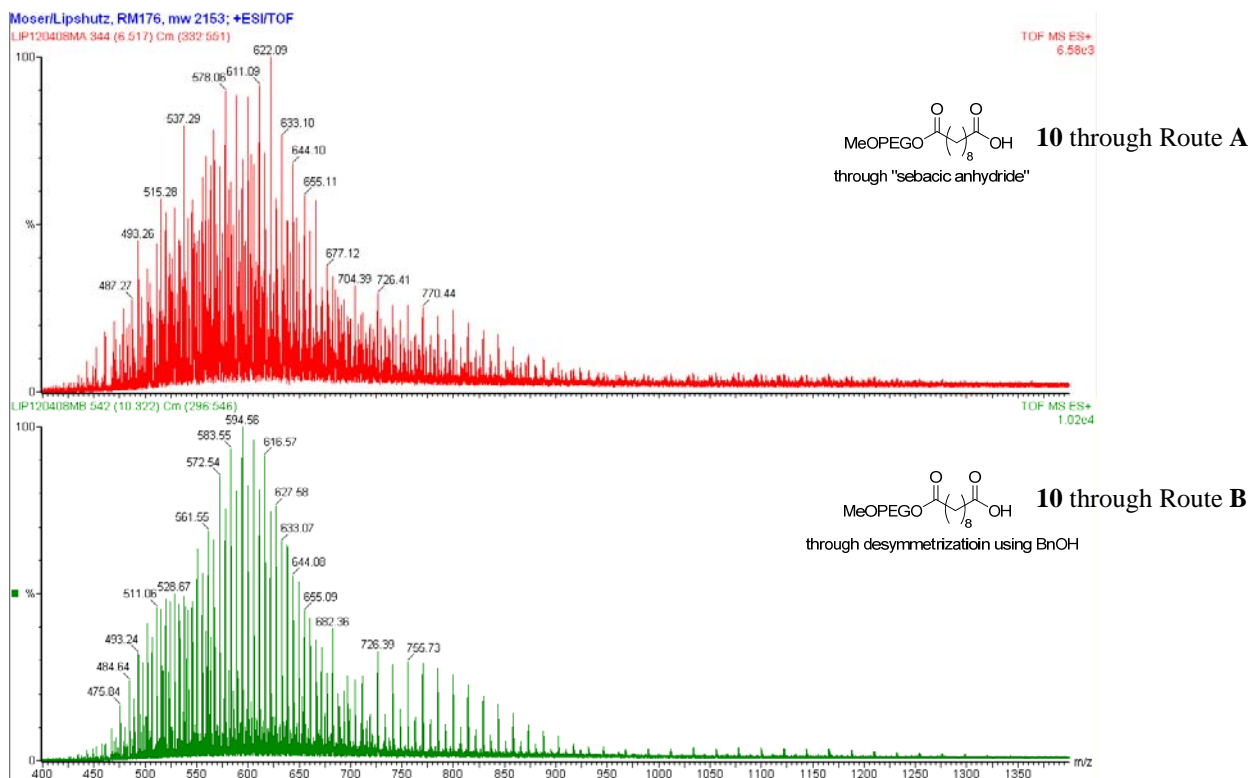

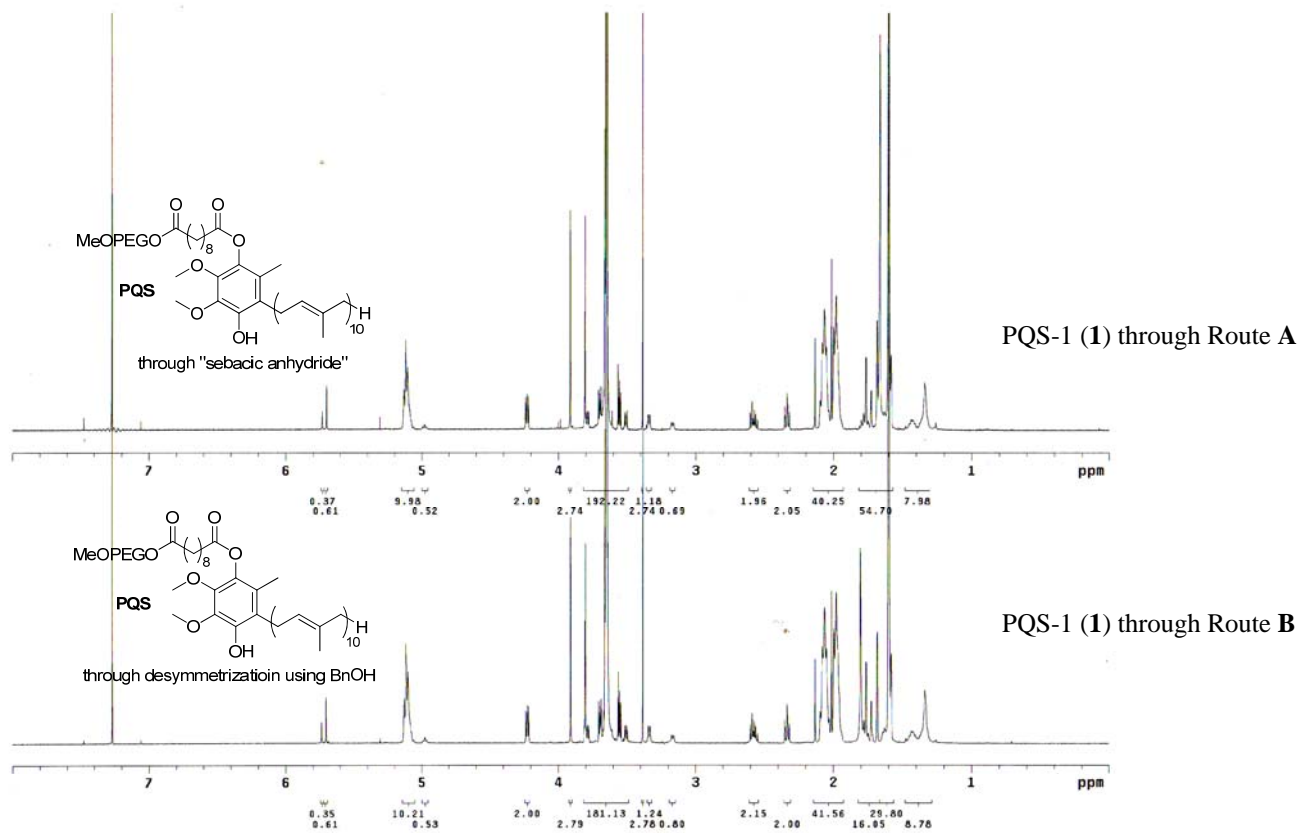

Moser/Lipshutz, RM180, mw 2999; +ESI/TOF

LIP121108MA 207 (3.919) Cm (207.323)

TOF MS ES+  
2.38e3

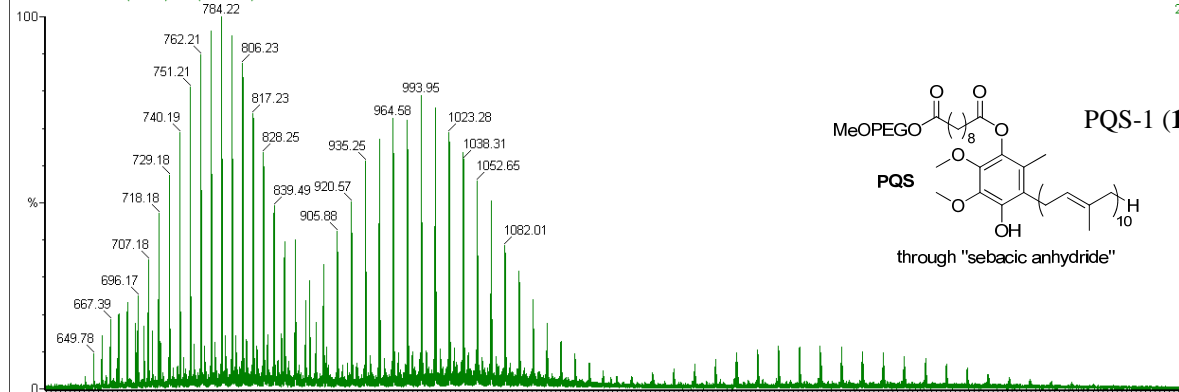

LIP120408MD 397 (7.544) Cm (261.399)

TOF MS ES+  
2.10e3

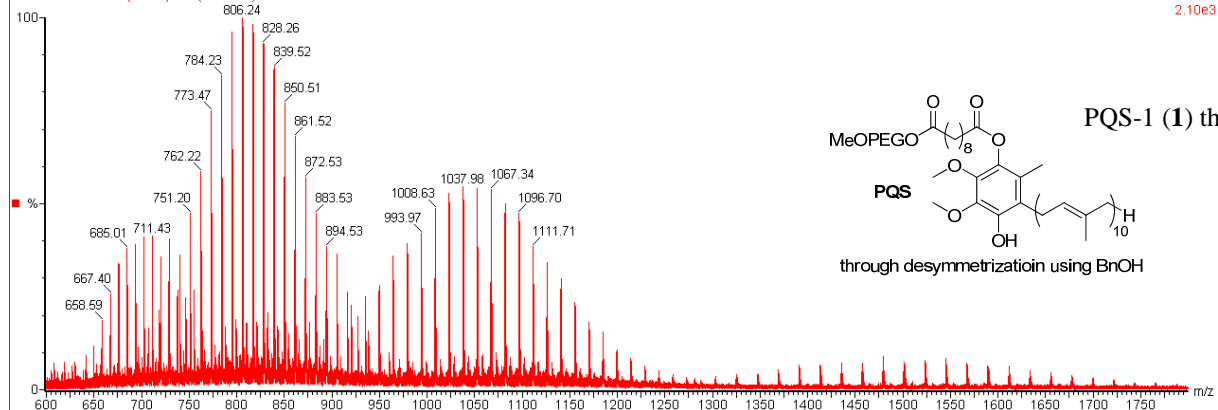

## II. Mass spectral data of PQS-3 (3)

Ghosai/Lipshutz, SG/2/172B MW polymer +ESI/TOF

LIP071310MB 318 (6.052) Sm (SG, 3x4.00); Cm (270:320)

TOF MS ES+  
9.00e3

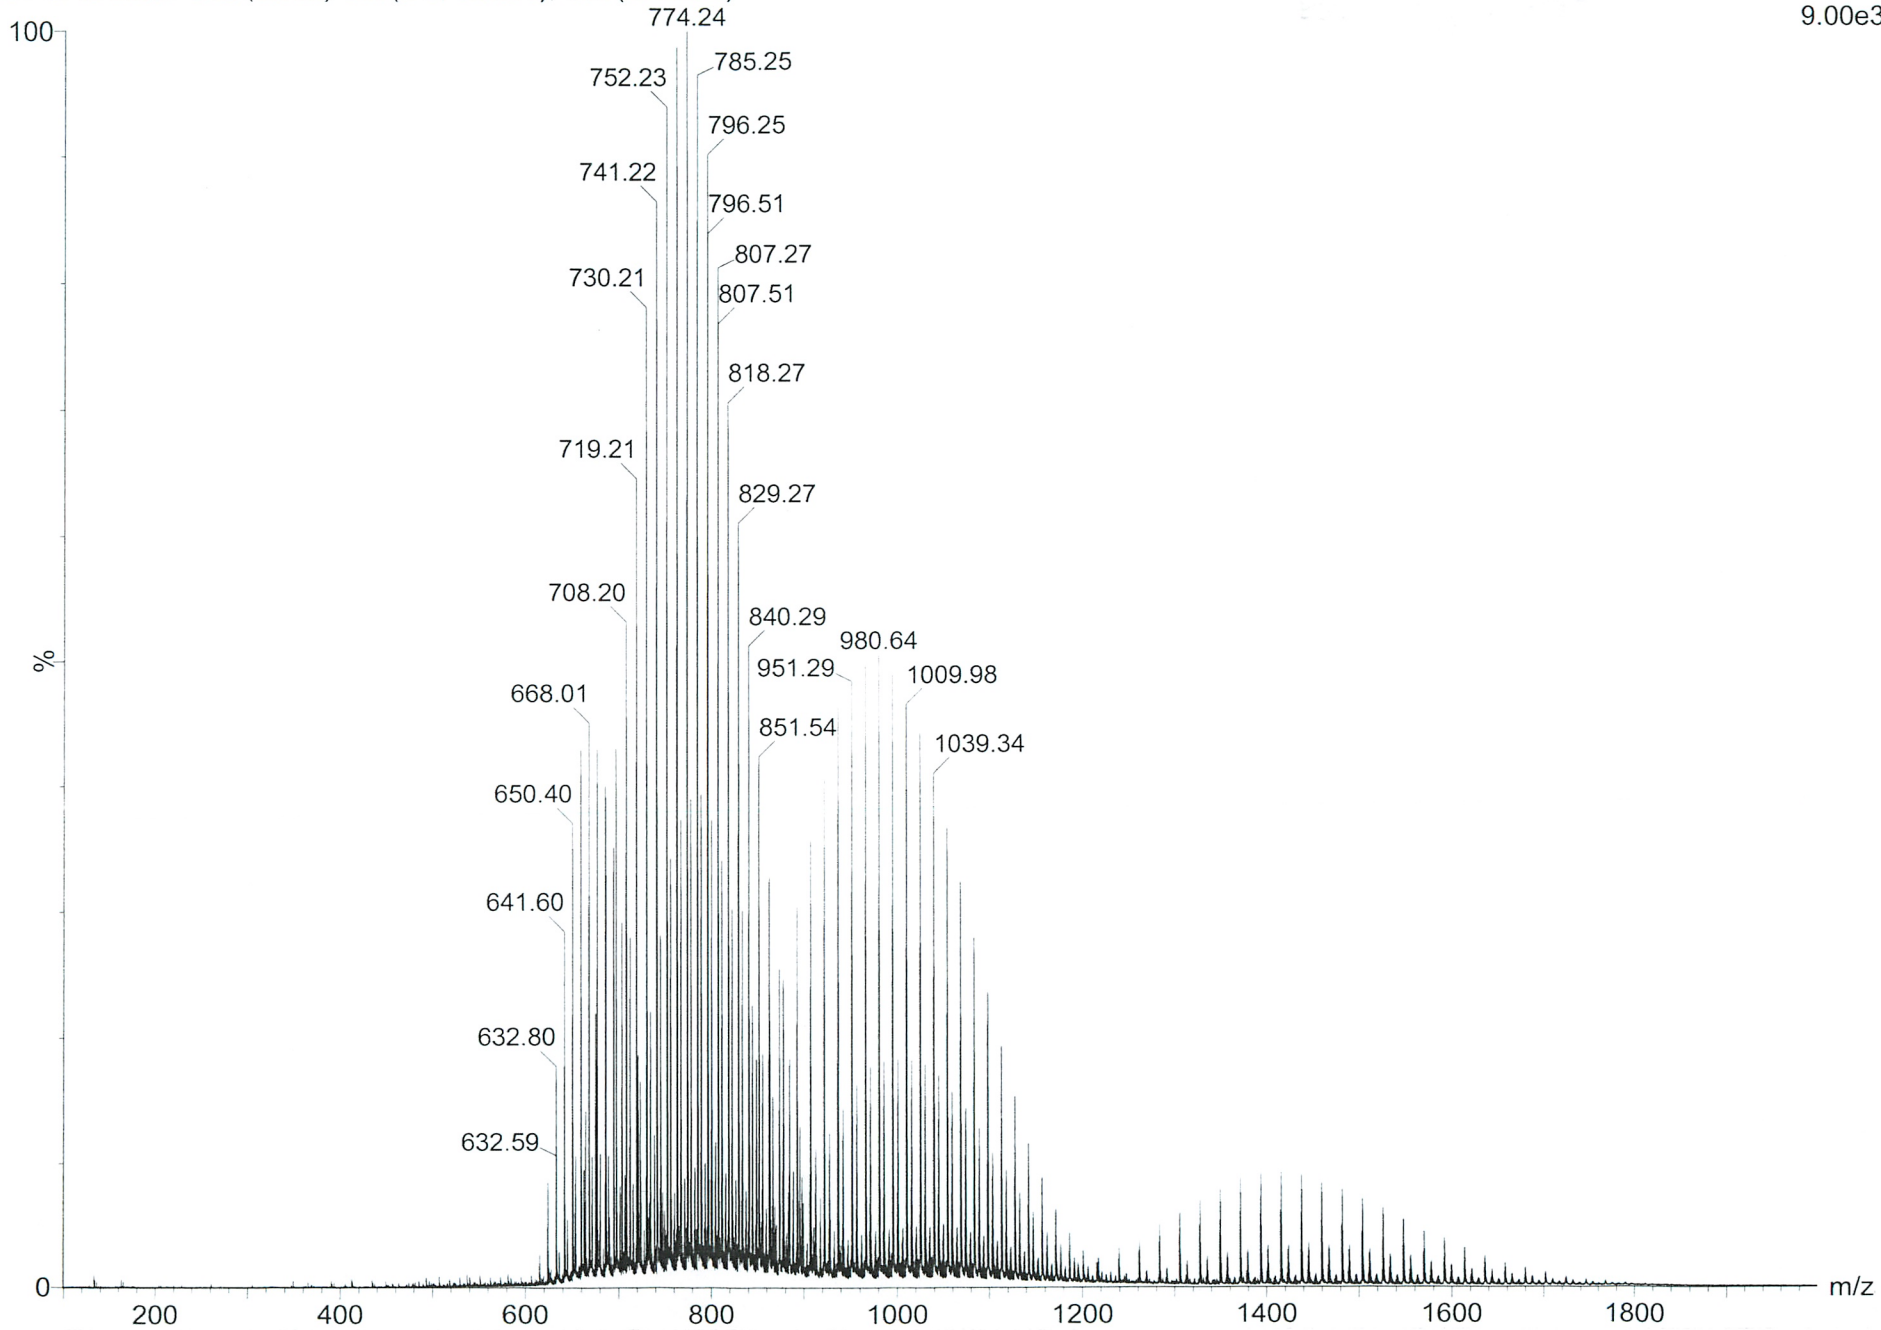

Ghosai/Lipshutz, SG/2/172B MW polymer +ESI/TOF

LIP071310MB 318 (6.052) Sm (SG, 3x4.00); Cm (270:320)

TOF MS ES+  
9.00e3

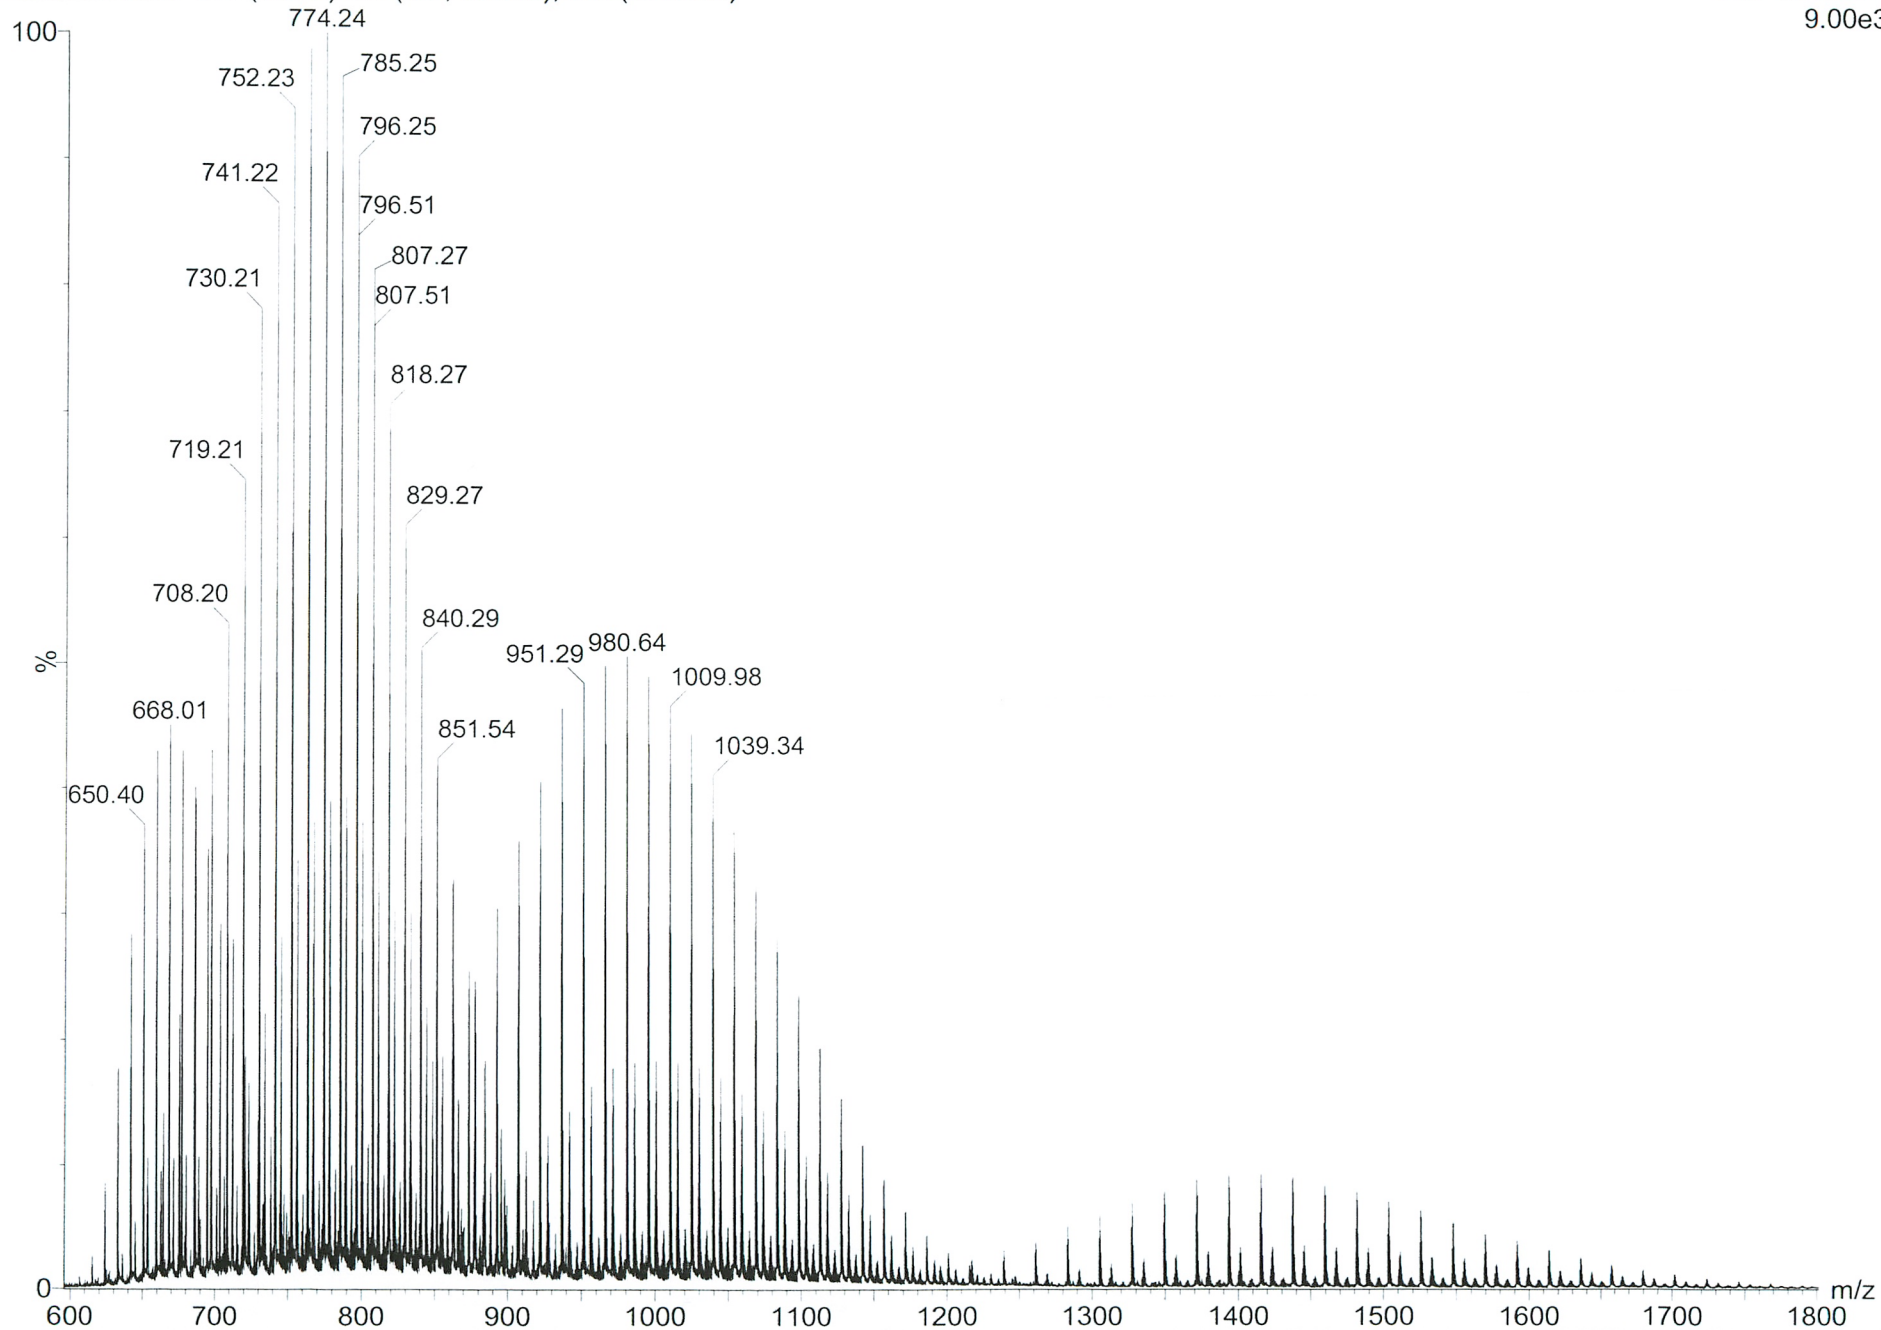

Ghosai/Lipshutz, SG/2/172B MW polymer +ESI/TOF

LIP071310MB 318 (6.052) Sm (SG, 3x4.00); Cm (270:320)

TOF MS ES+  
4.55e3

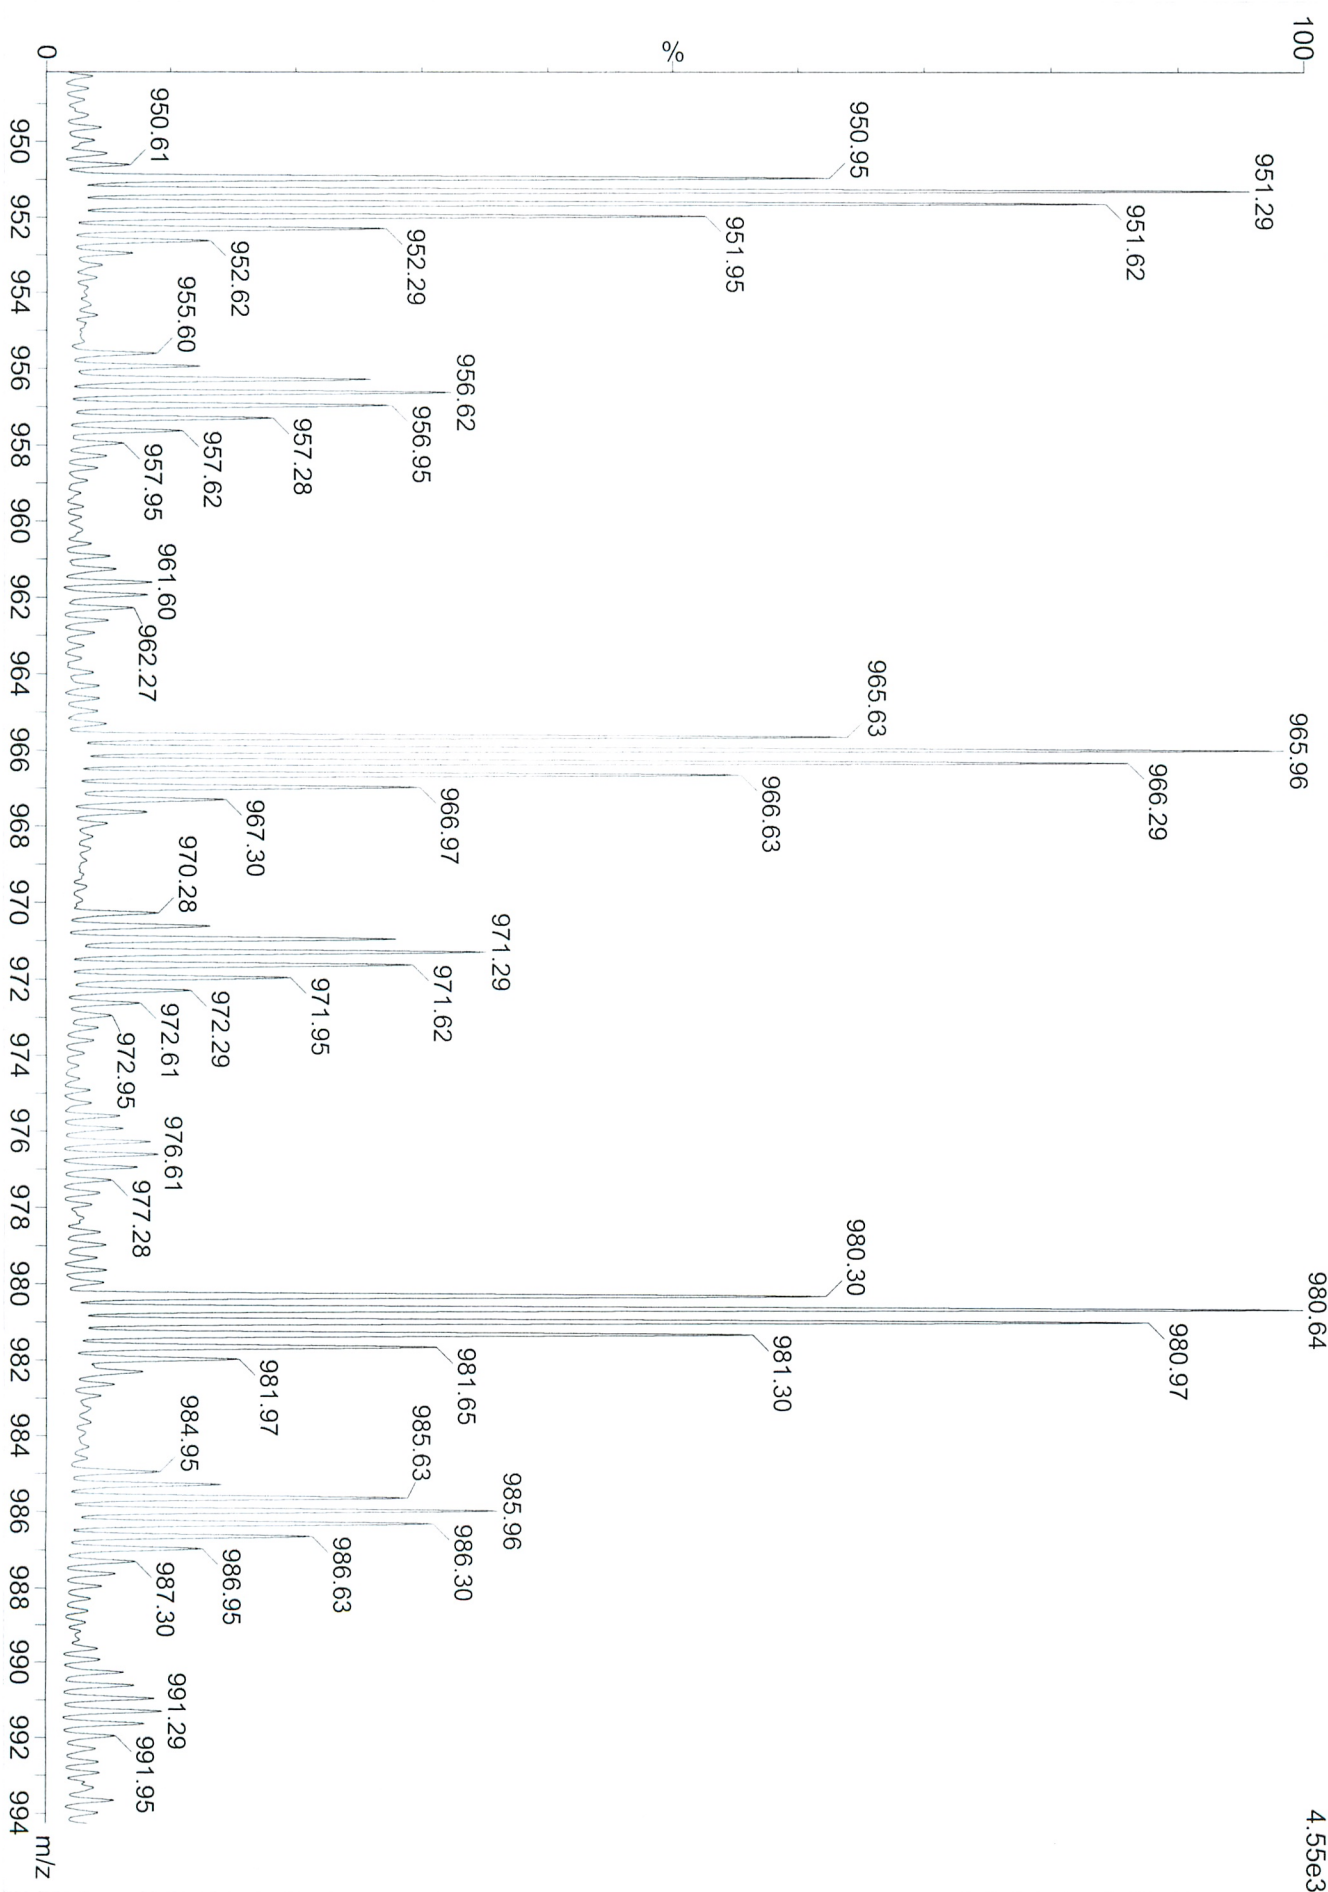

Ghosai/Lipshutz, SG/2/172B MW polymer +ESI/TOF

LIP071310MB 318 (6.052) Sm (SG, 3x4.00); Cm (270:320)

100  
1393.43

TOF MS ES+  
835

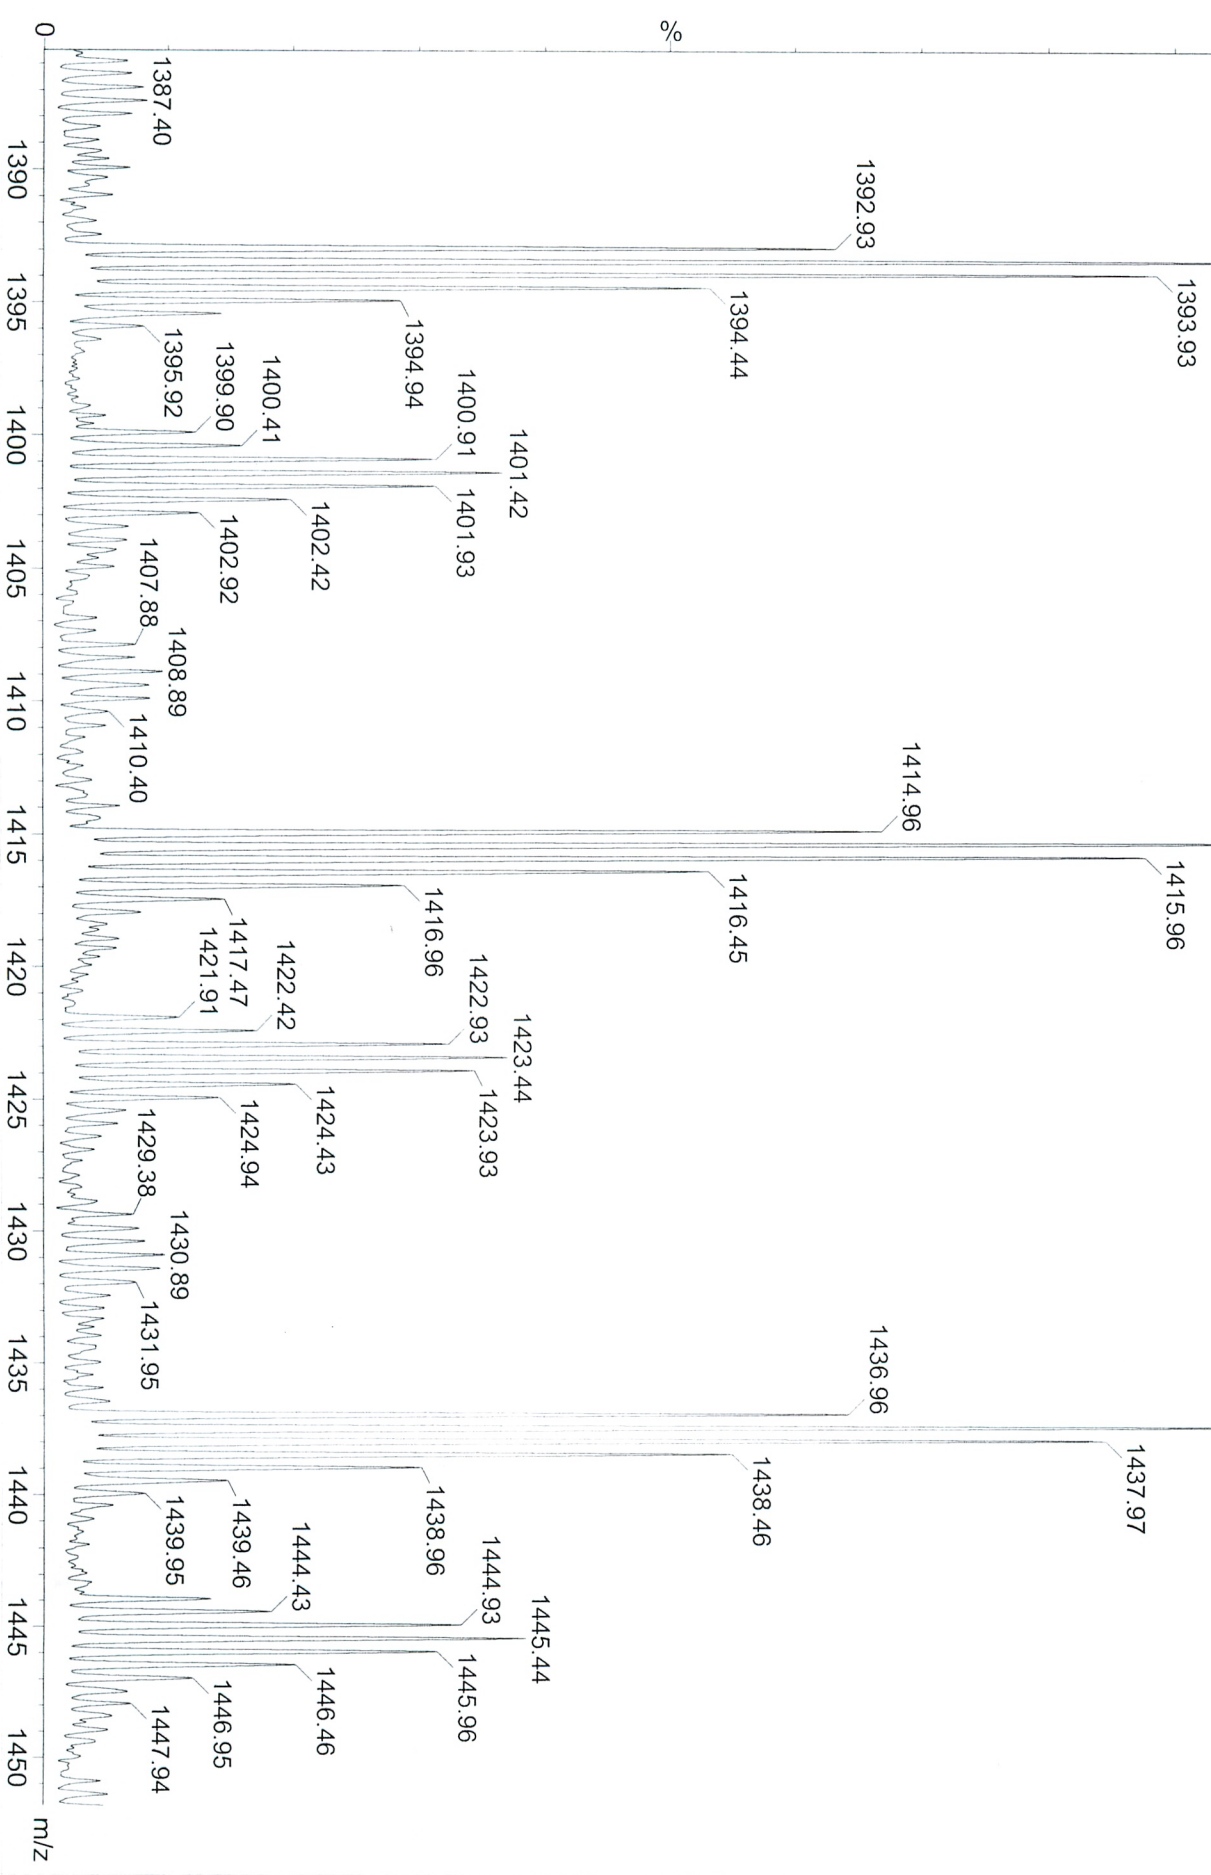

Ghosai/Lipshutz, SG/2/172B MW polymer +ESI/TOF

LIP071310MB 318 (6.052) Sm (SG, 3x4.00); Cm (270:320)

TOF MS ES+  
9.00e3

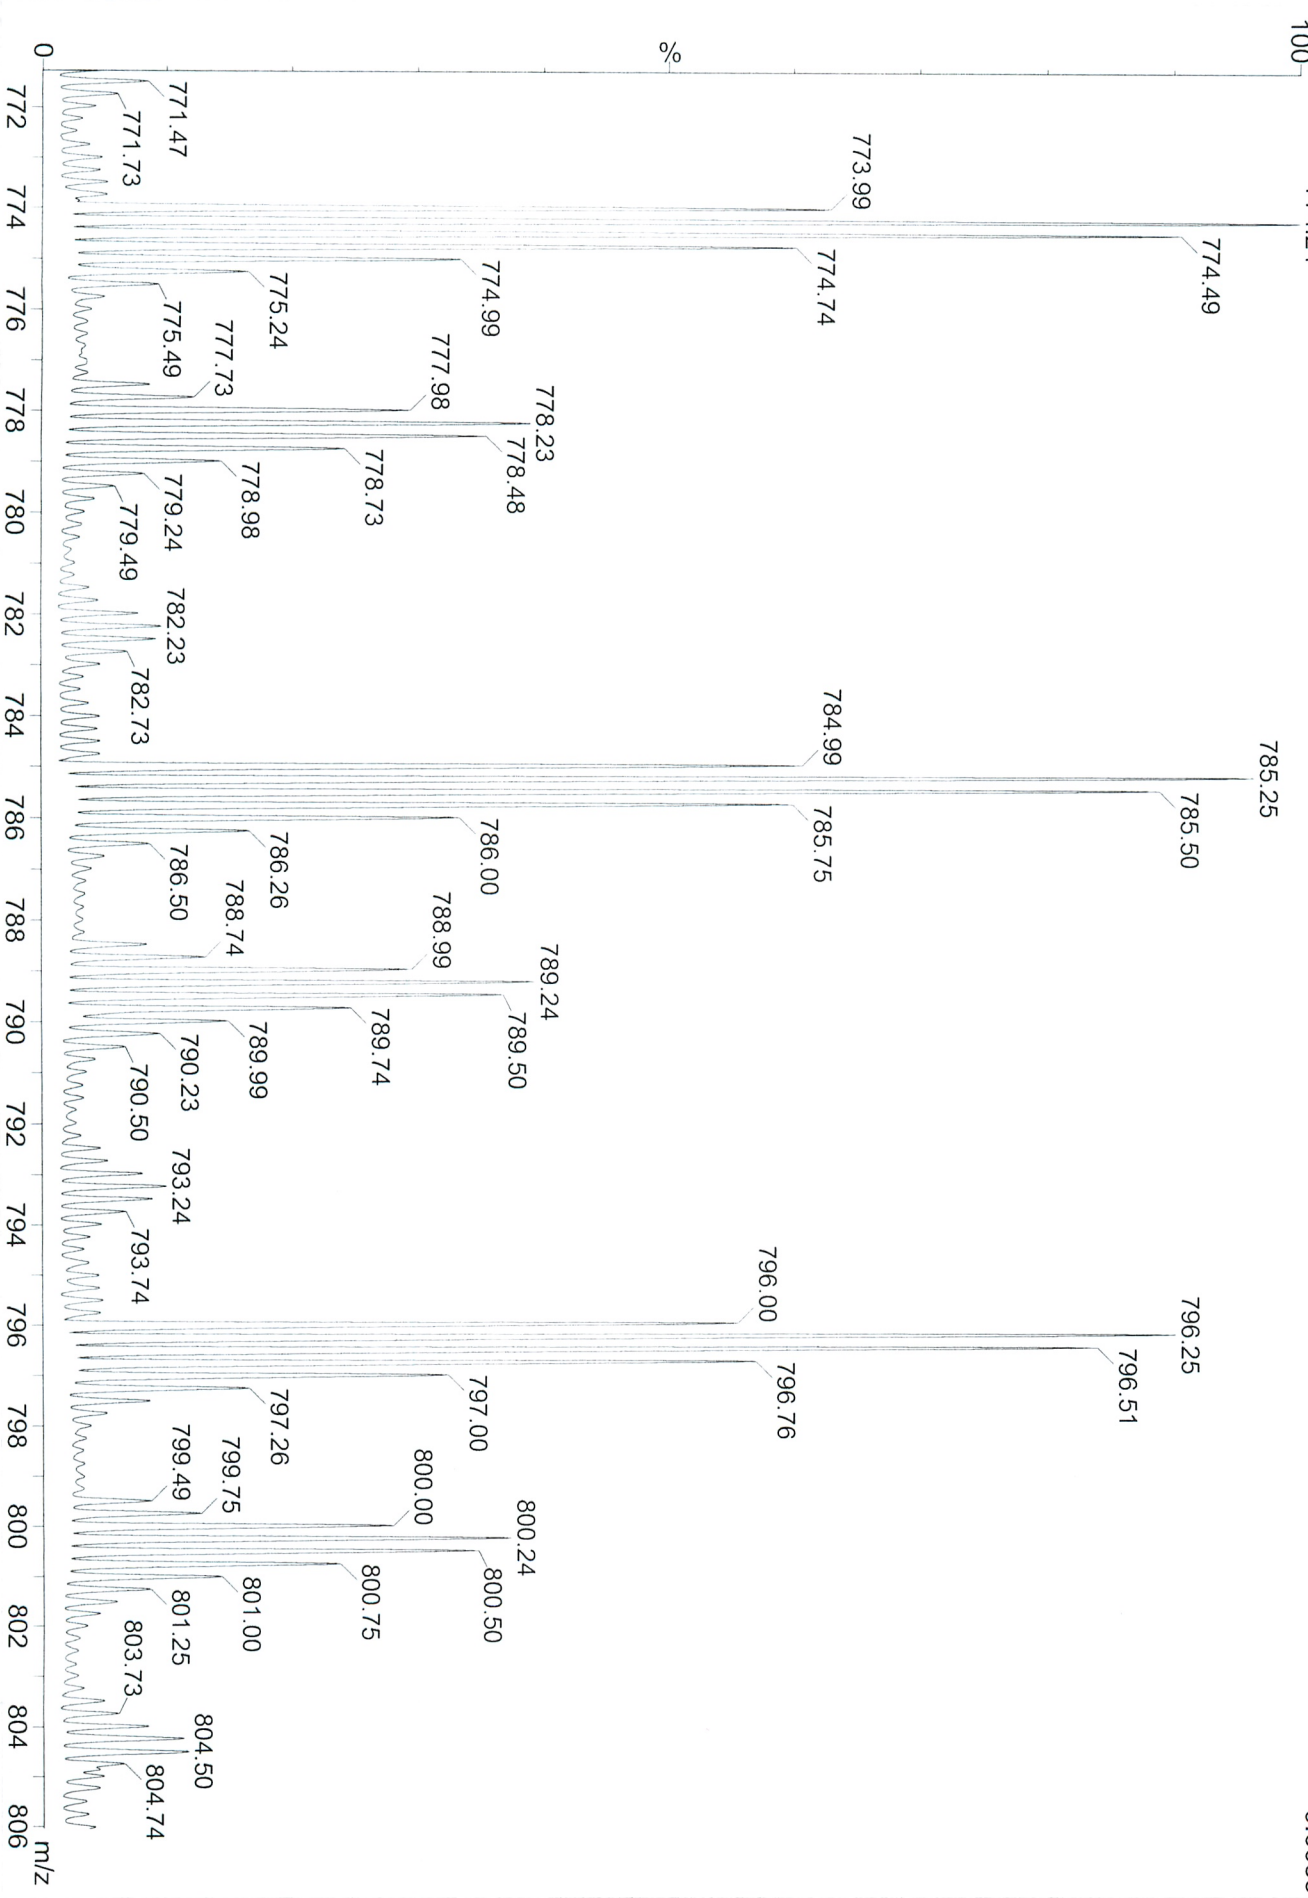



Ghosai/Lipshutz, SG/2/172B MW polymer +ESI/TOF

LIP071310MB 318 (6.052) Sm (SG, 3x4.00); Cm (270:320)

TOF MS ES+  
835

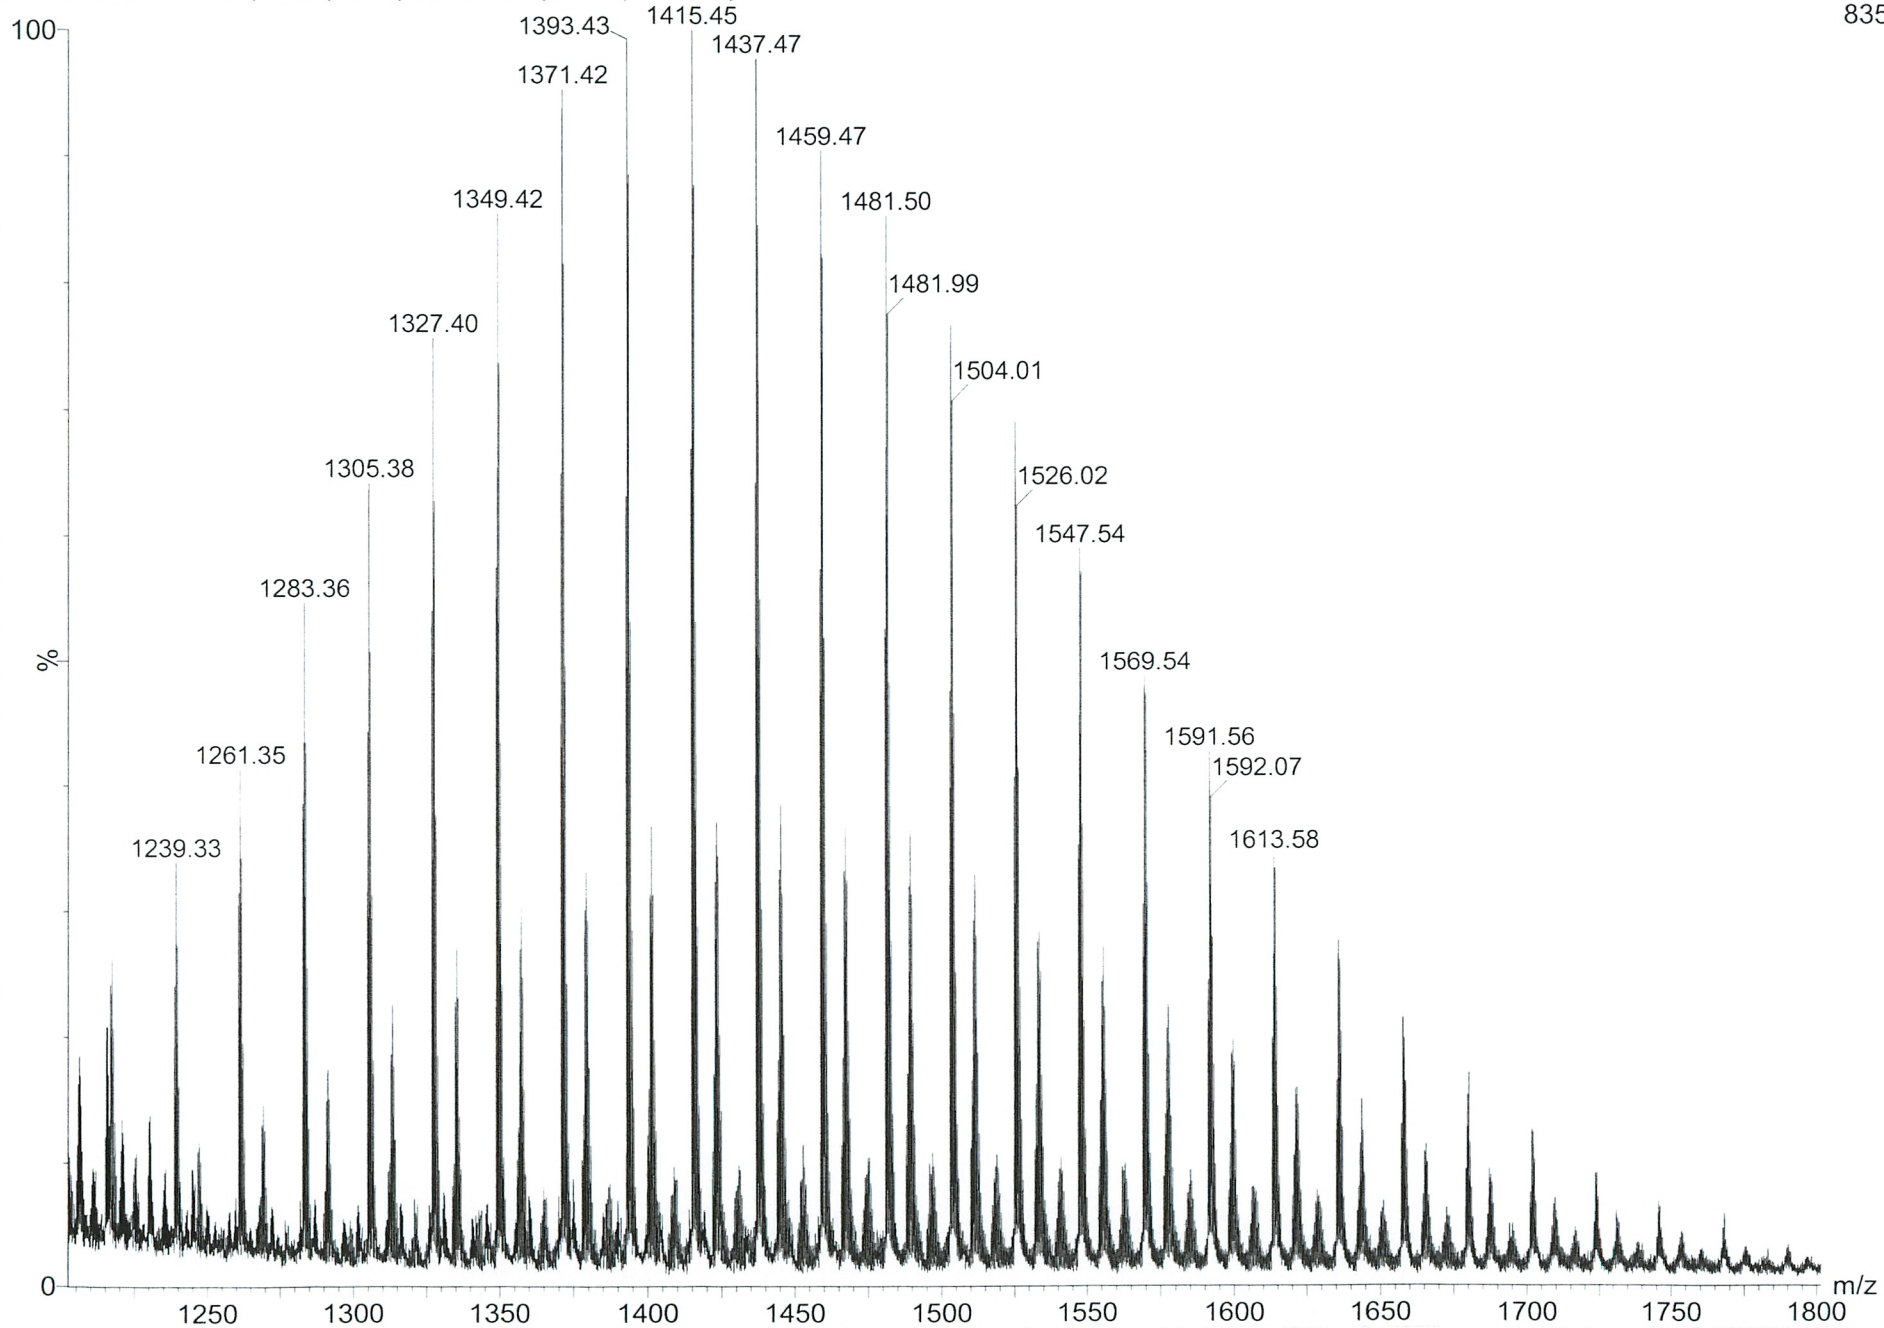

### III. Spectral data ( $^1\text{H}$ and $^{13}\text{C}$ ) of all new compounds

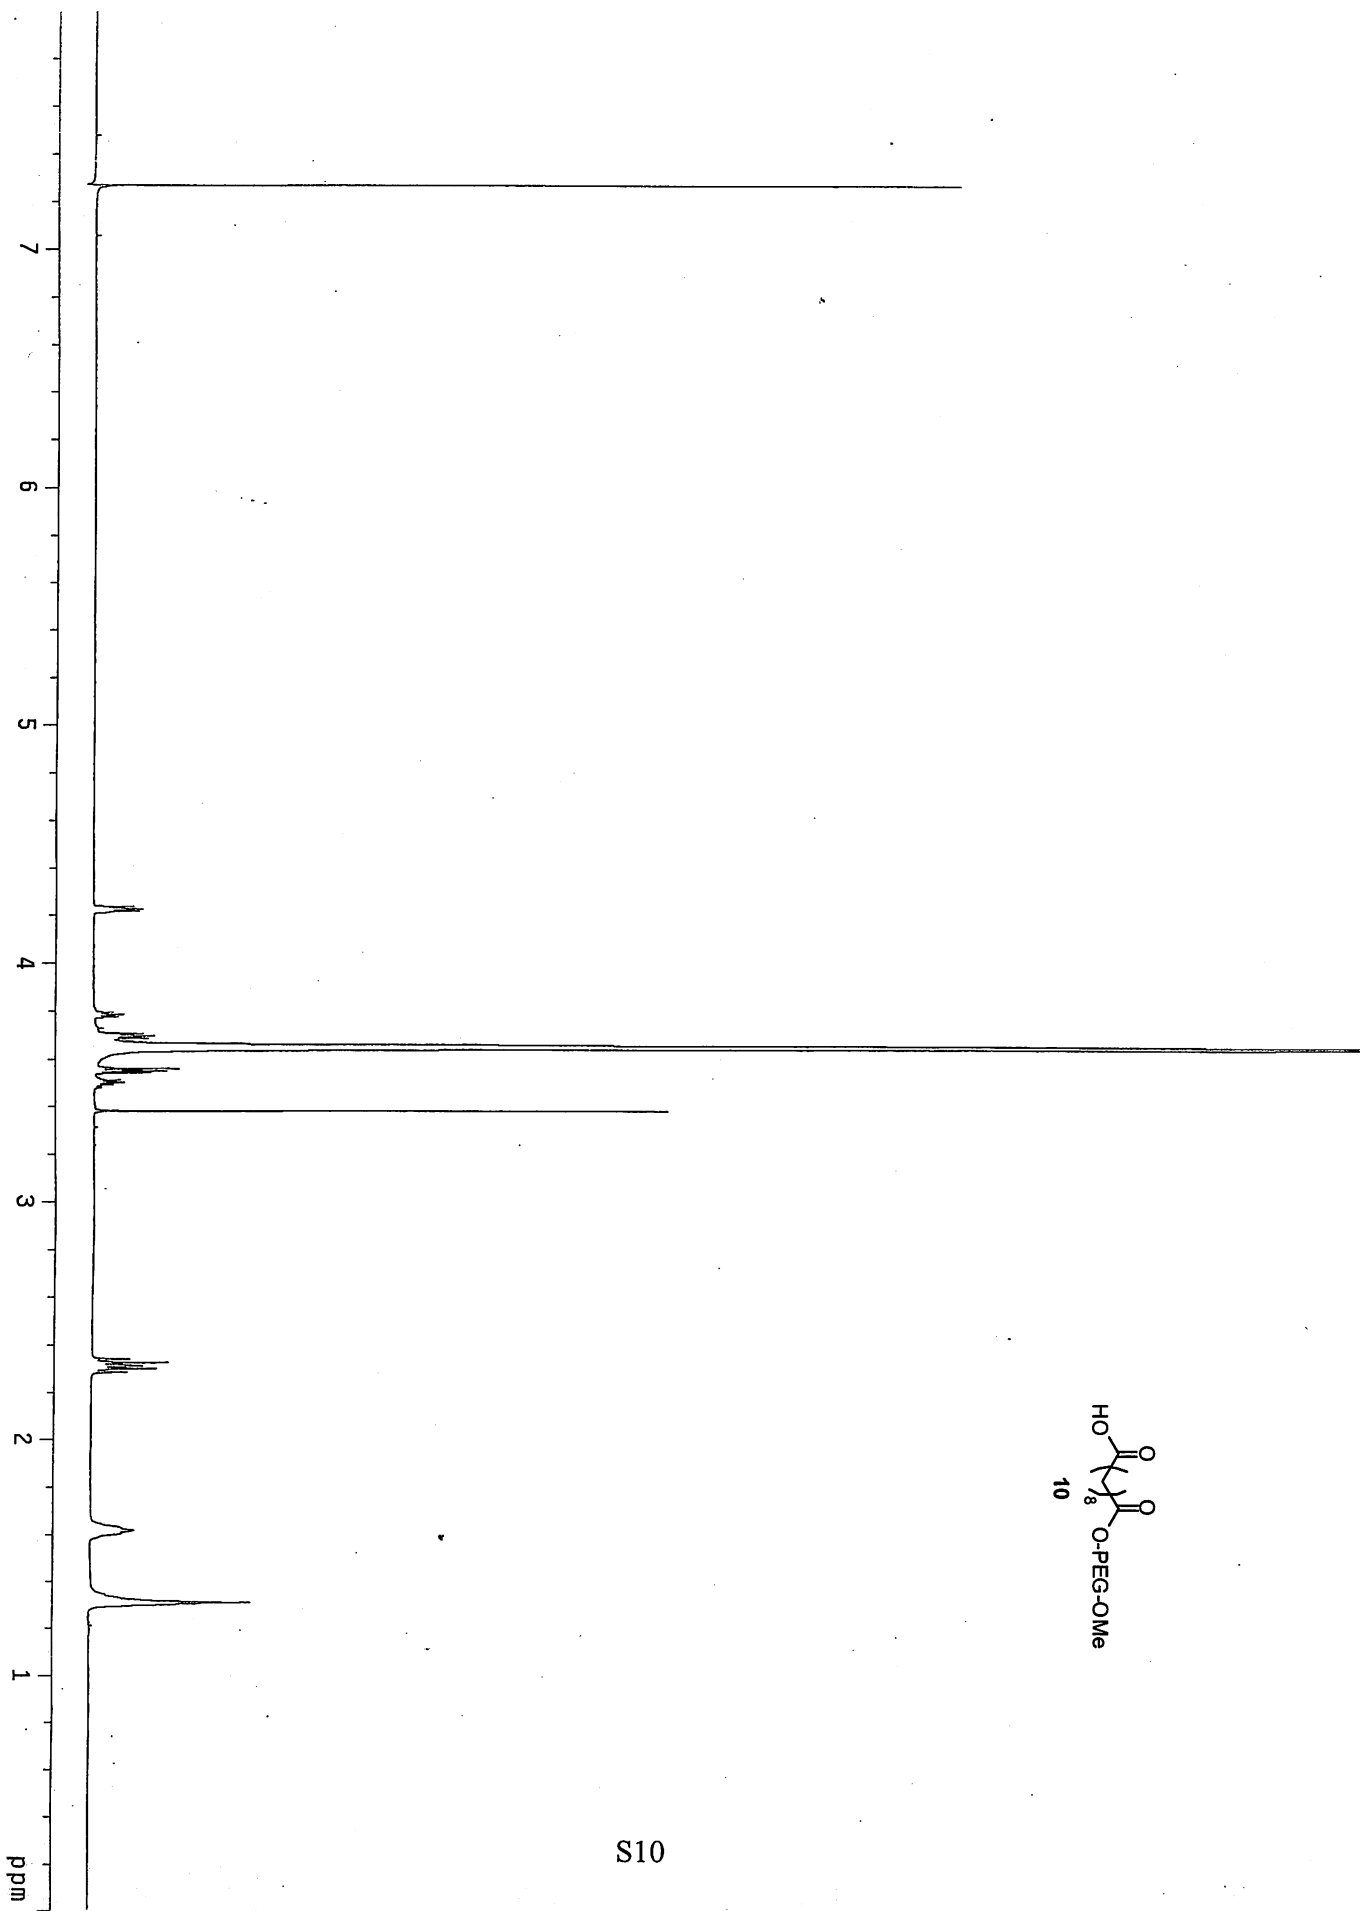

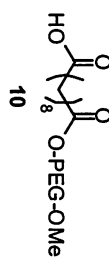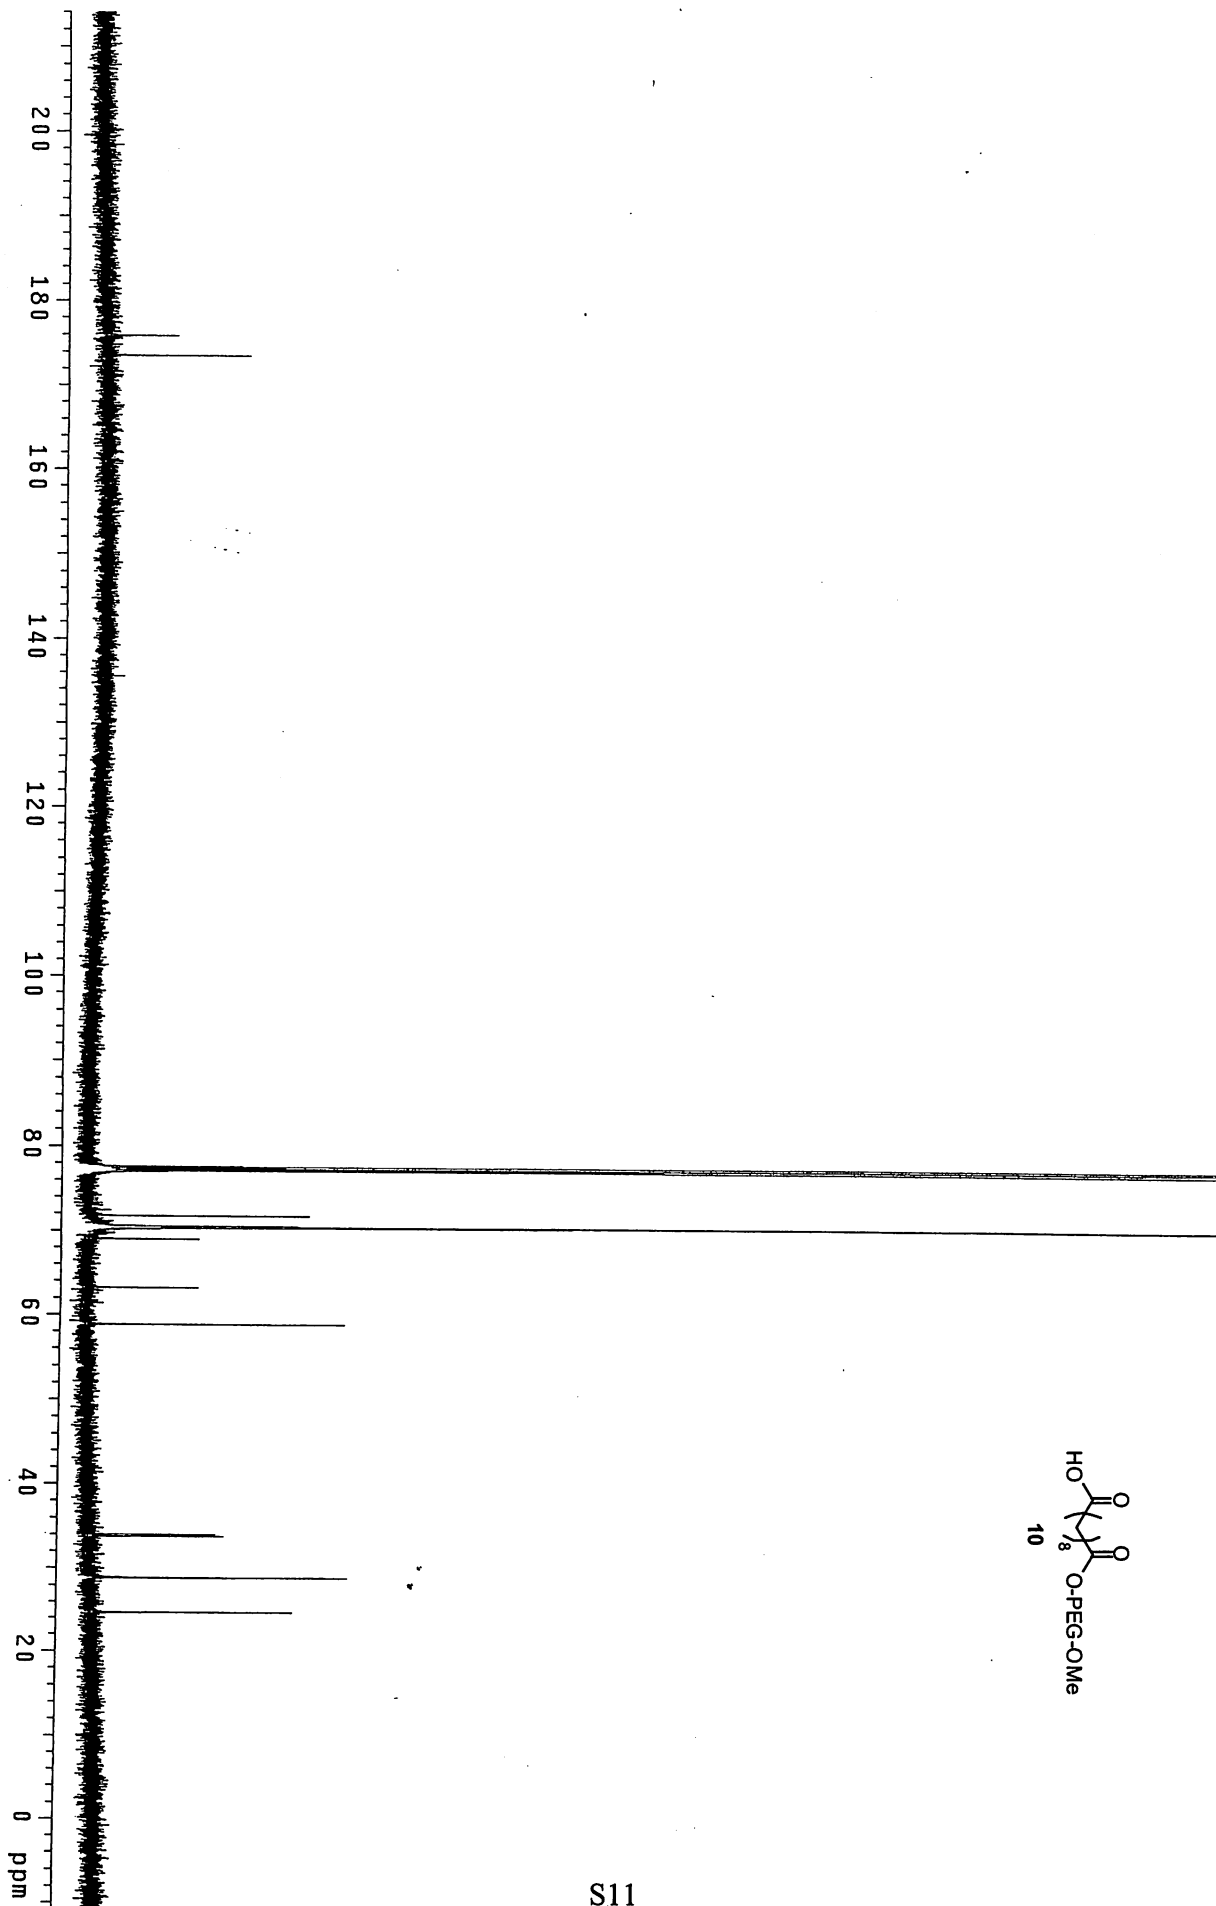

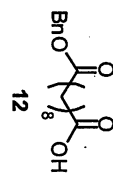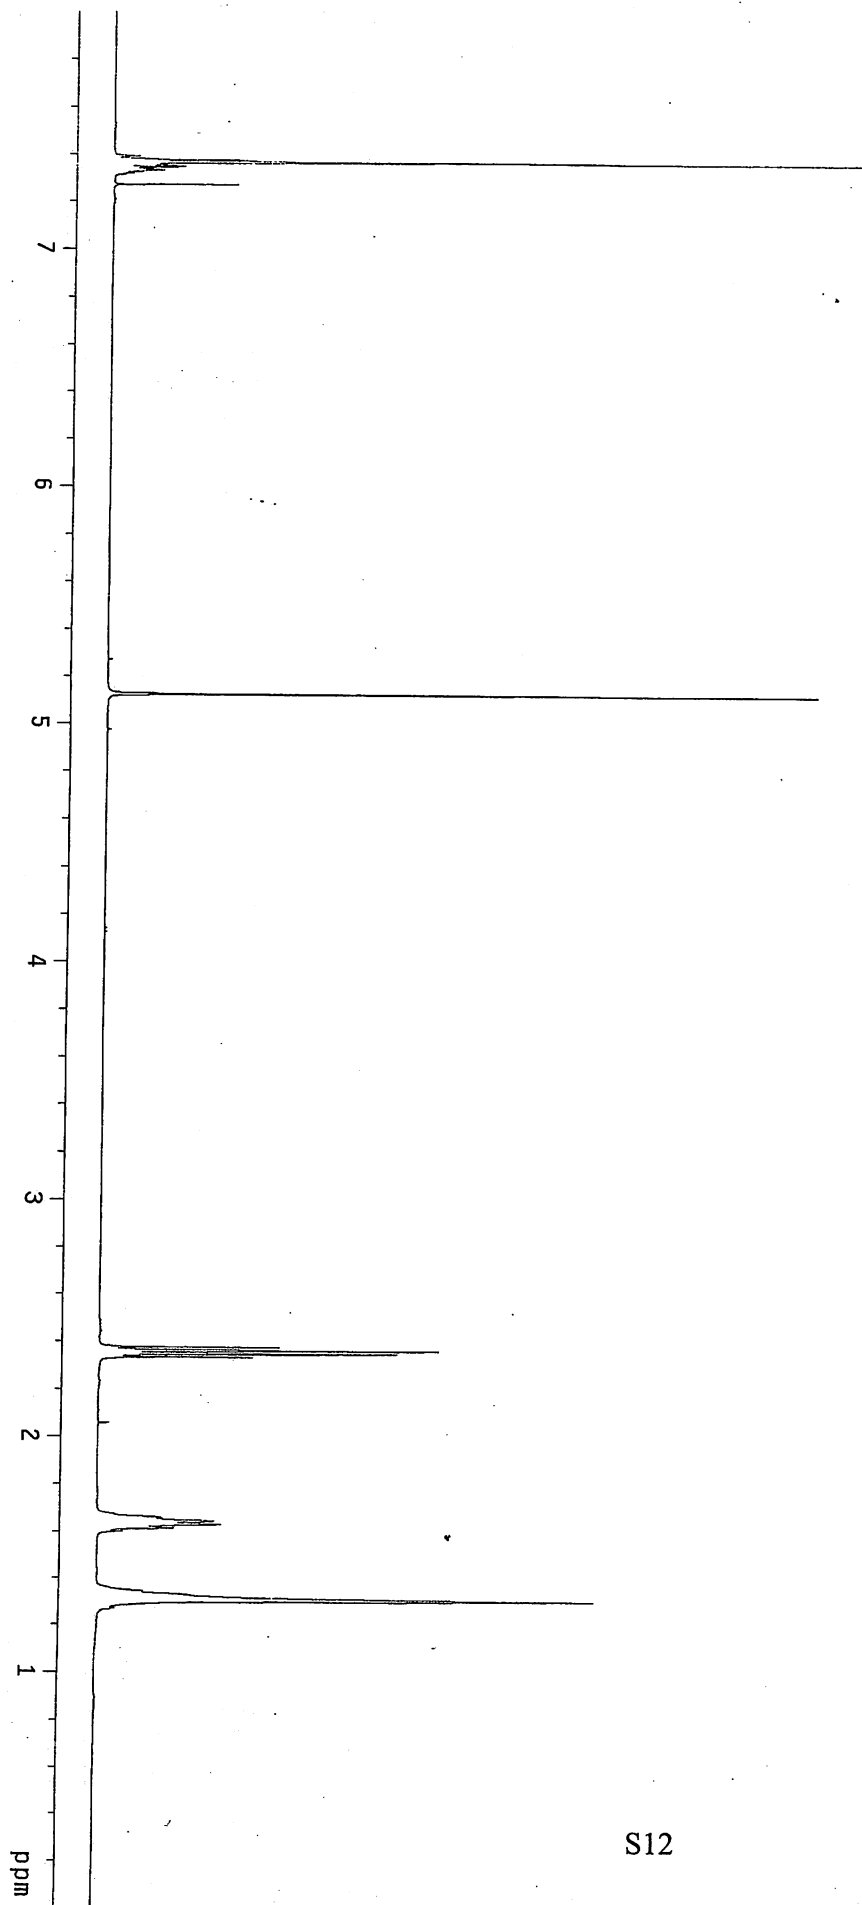

S12

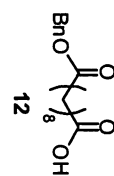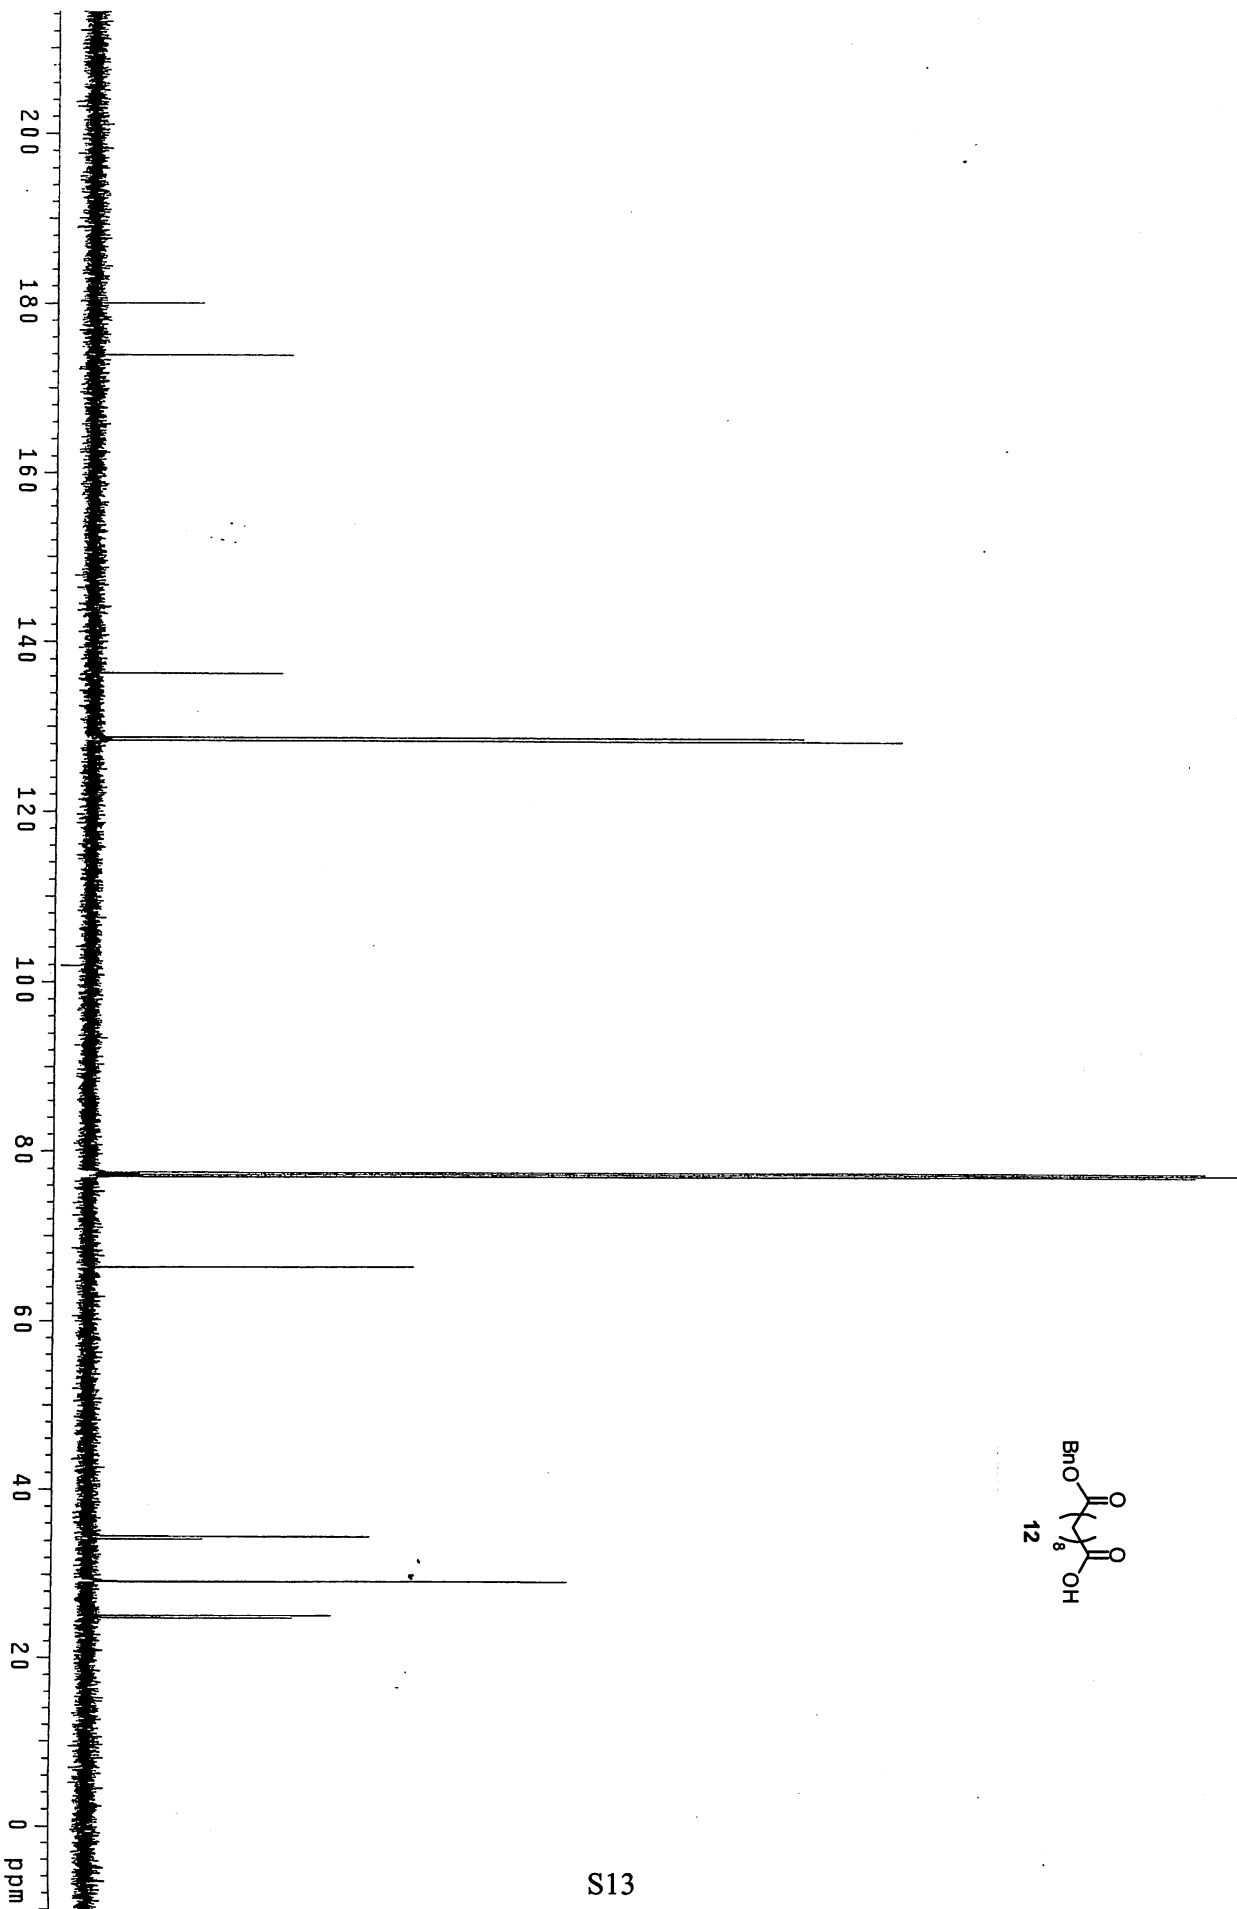

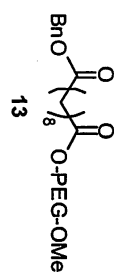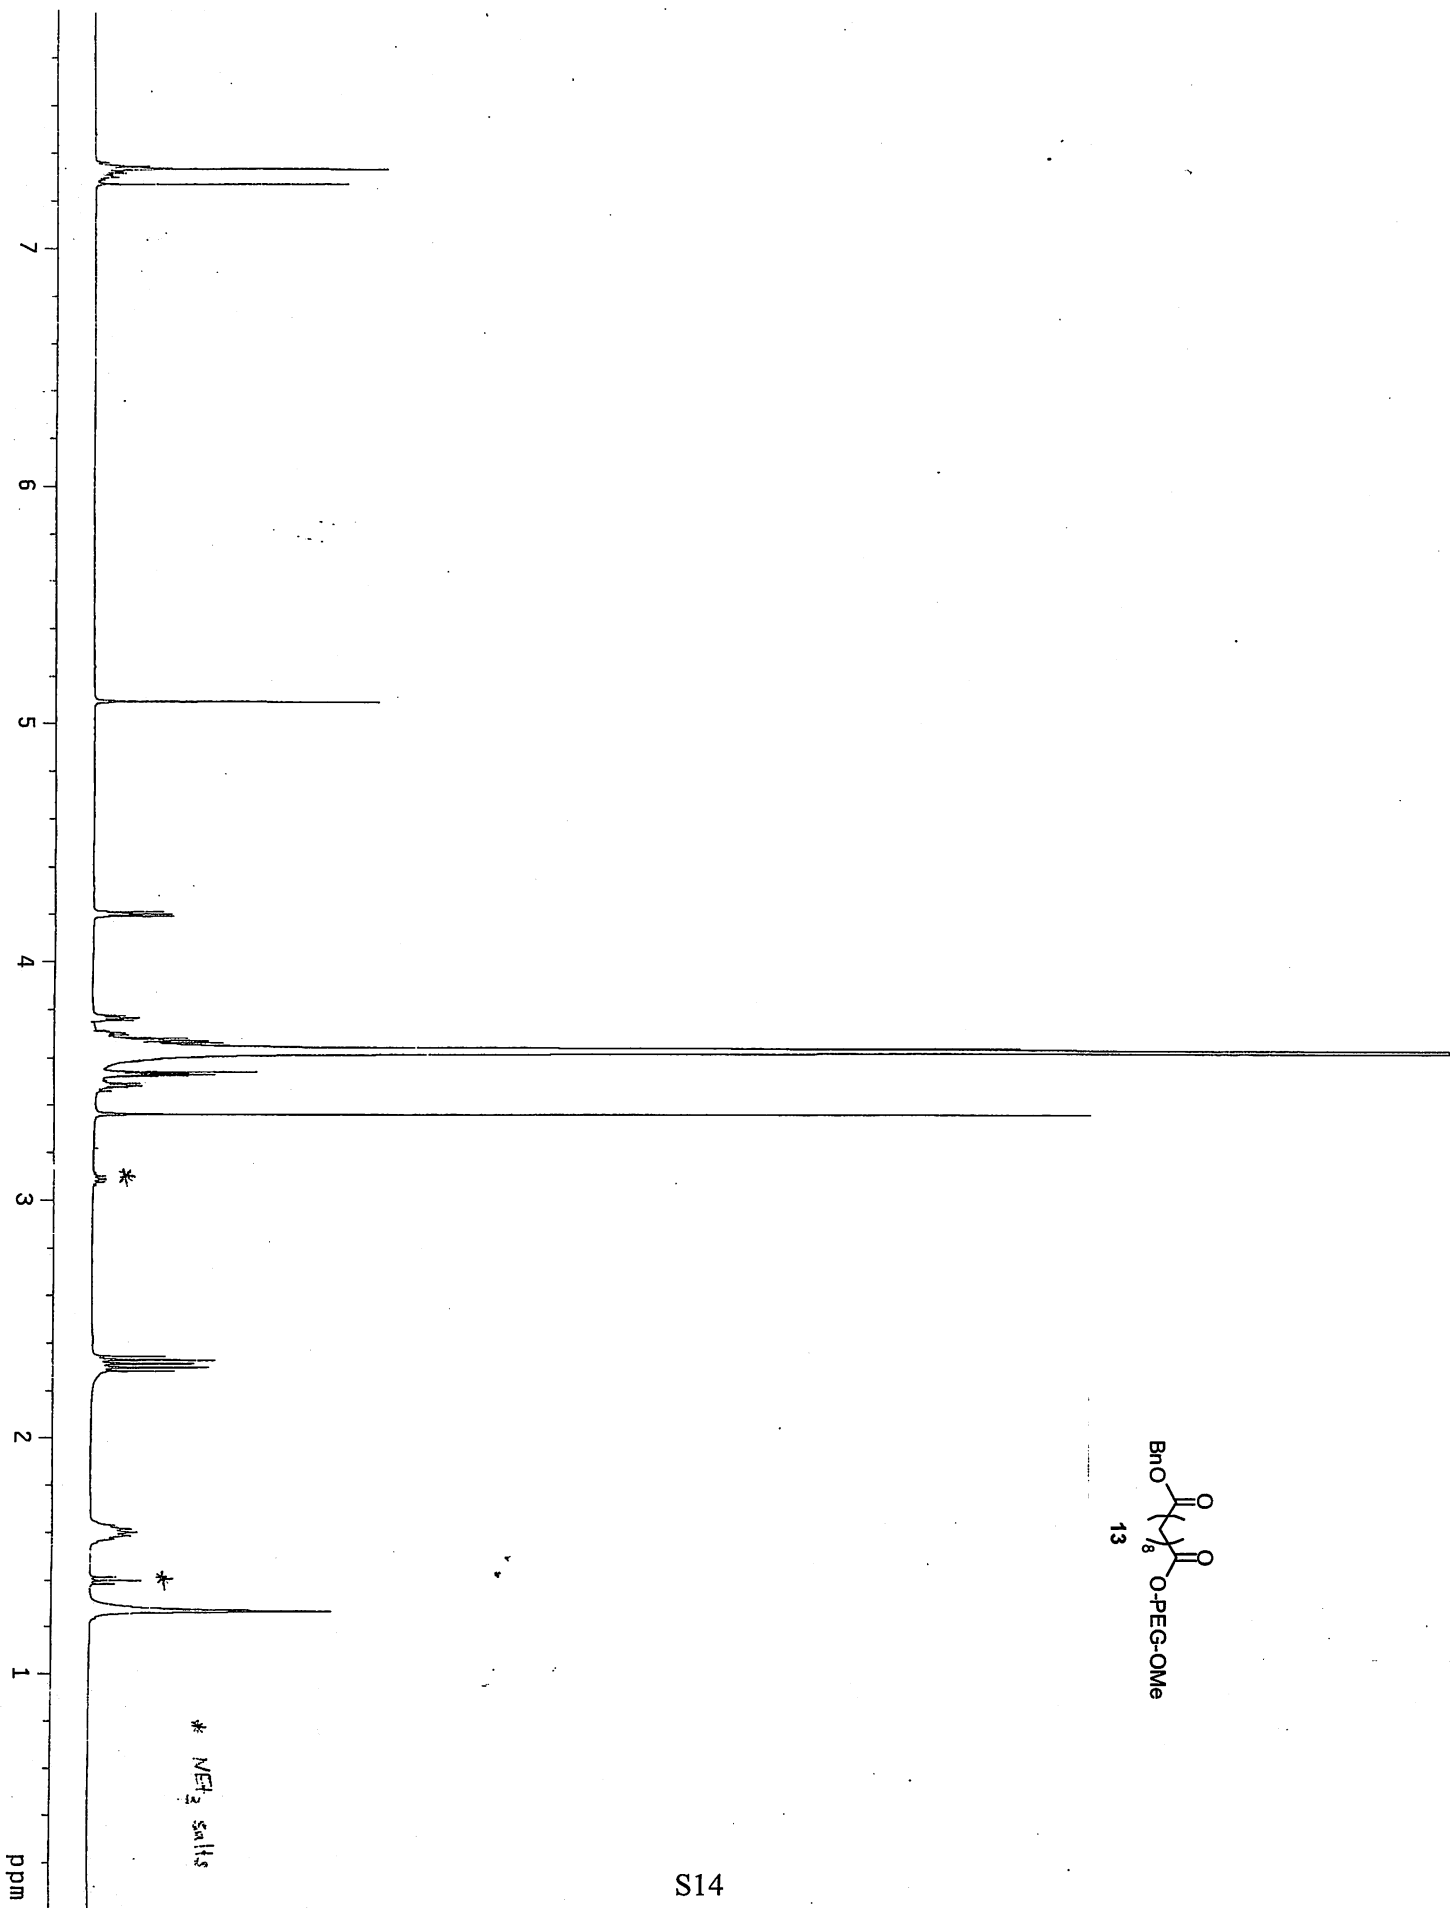

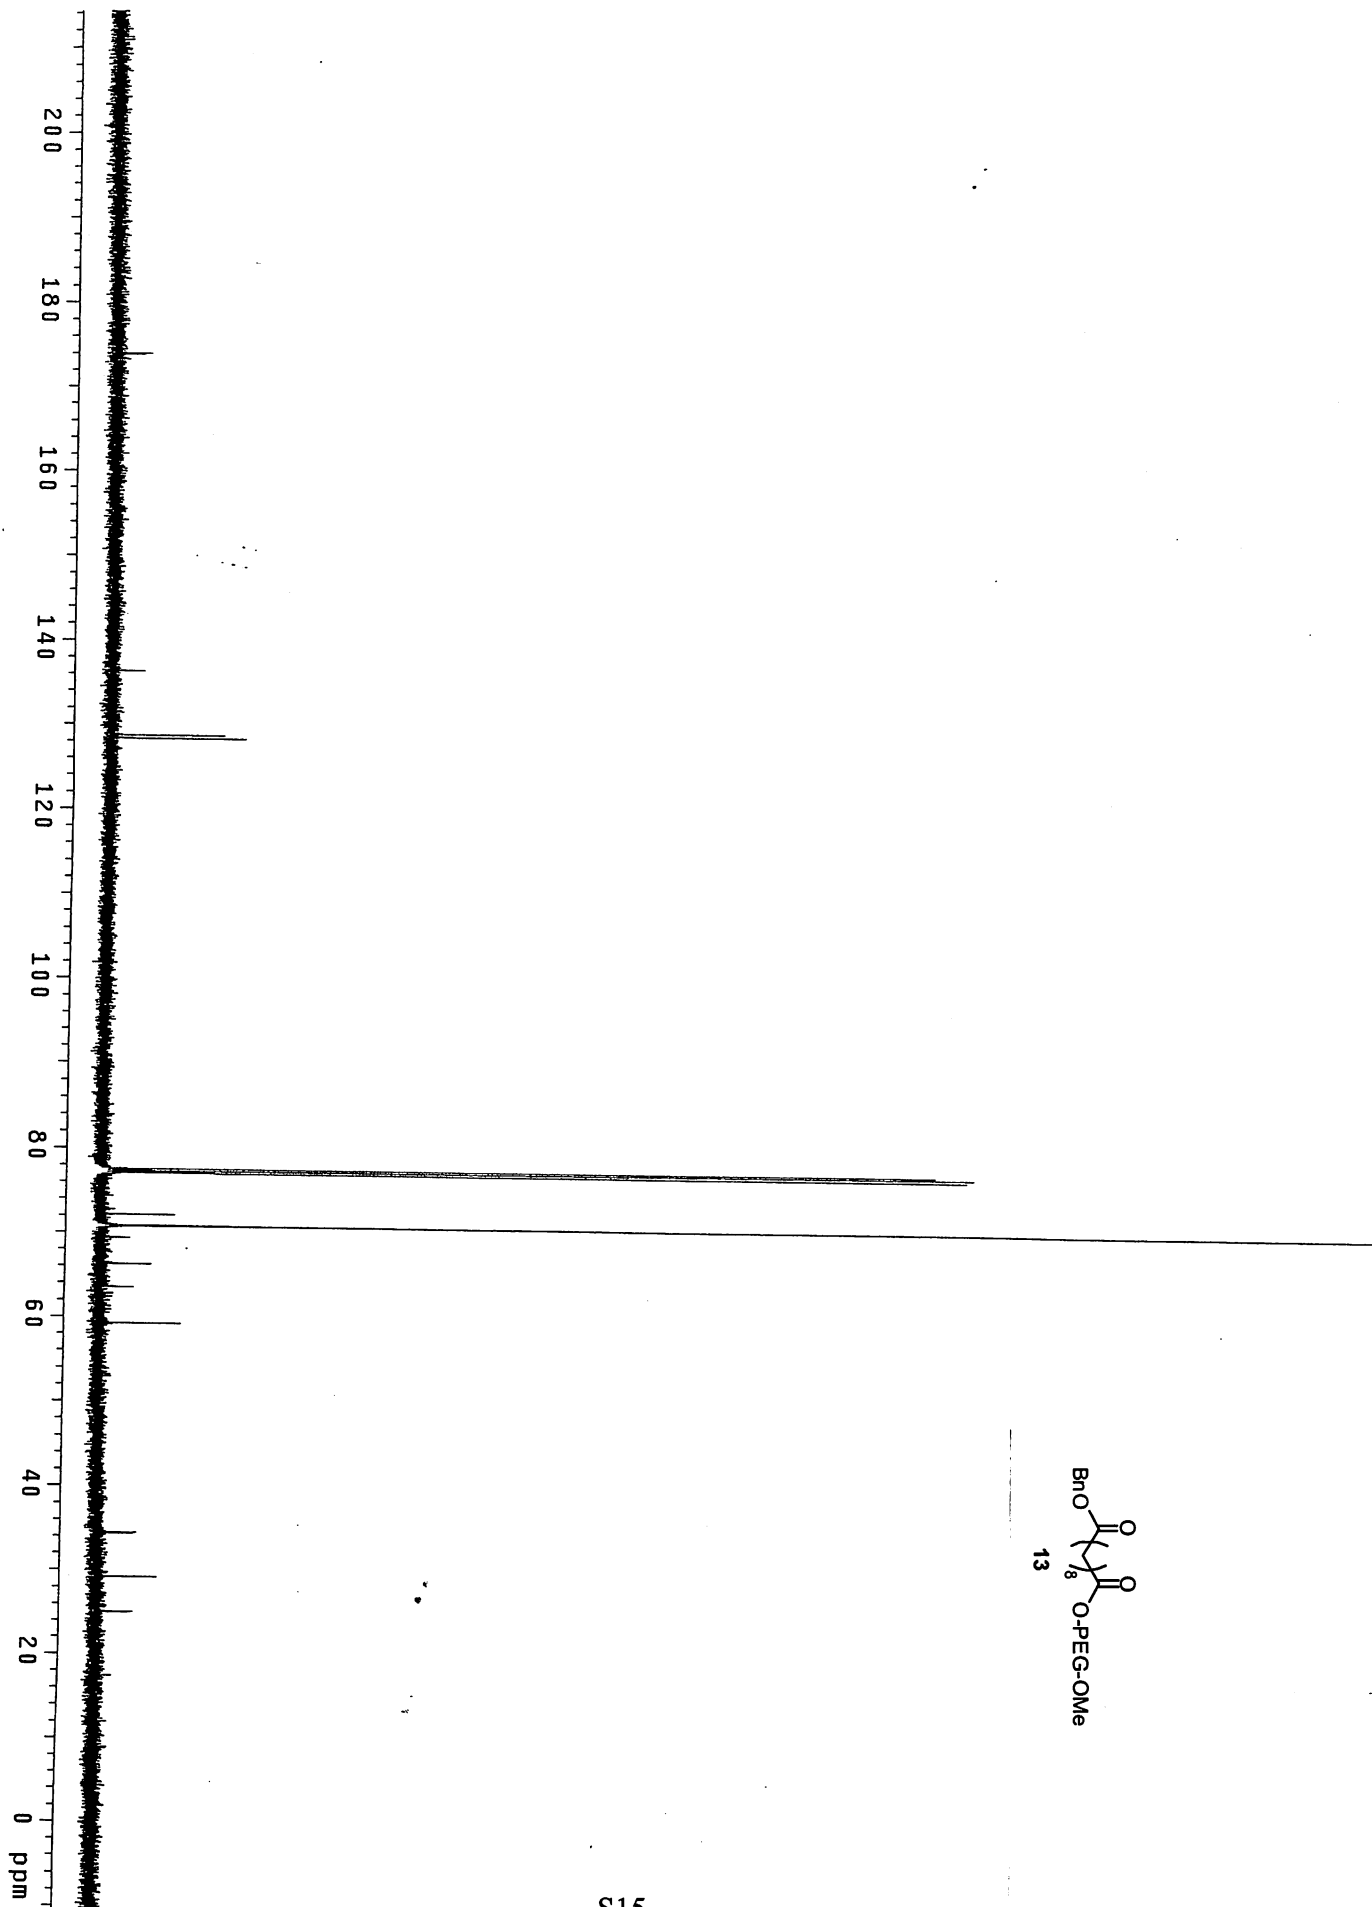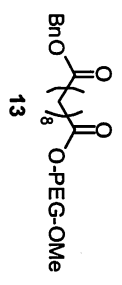

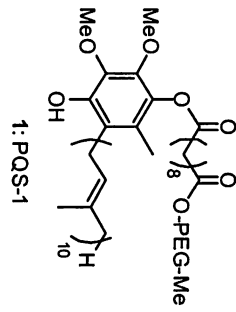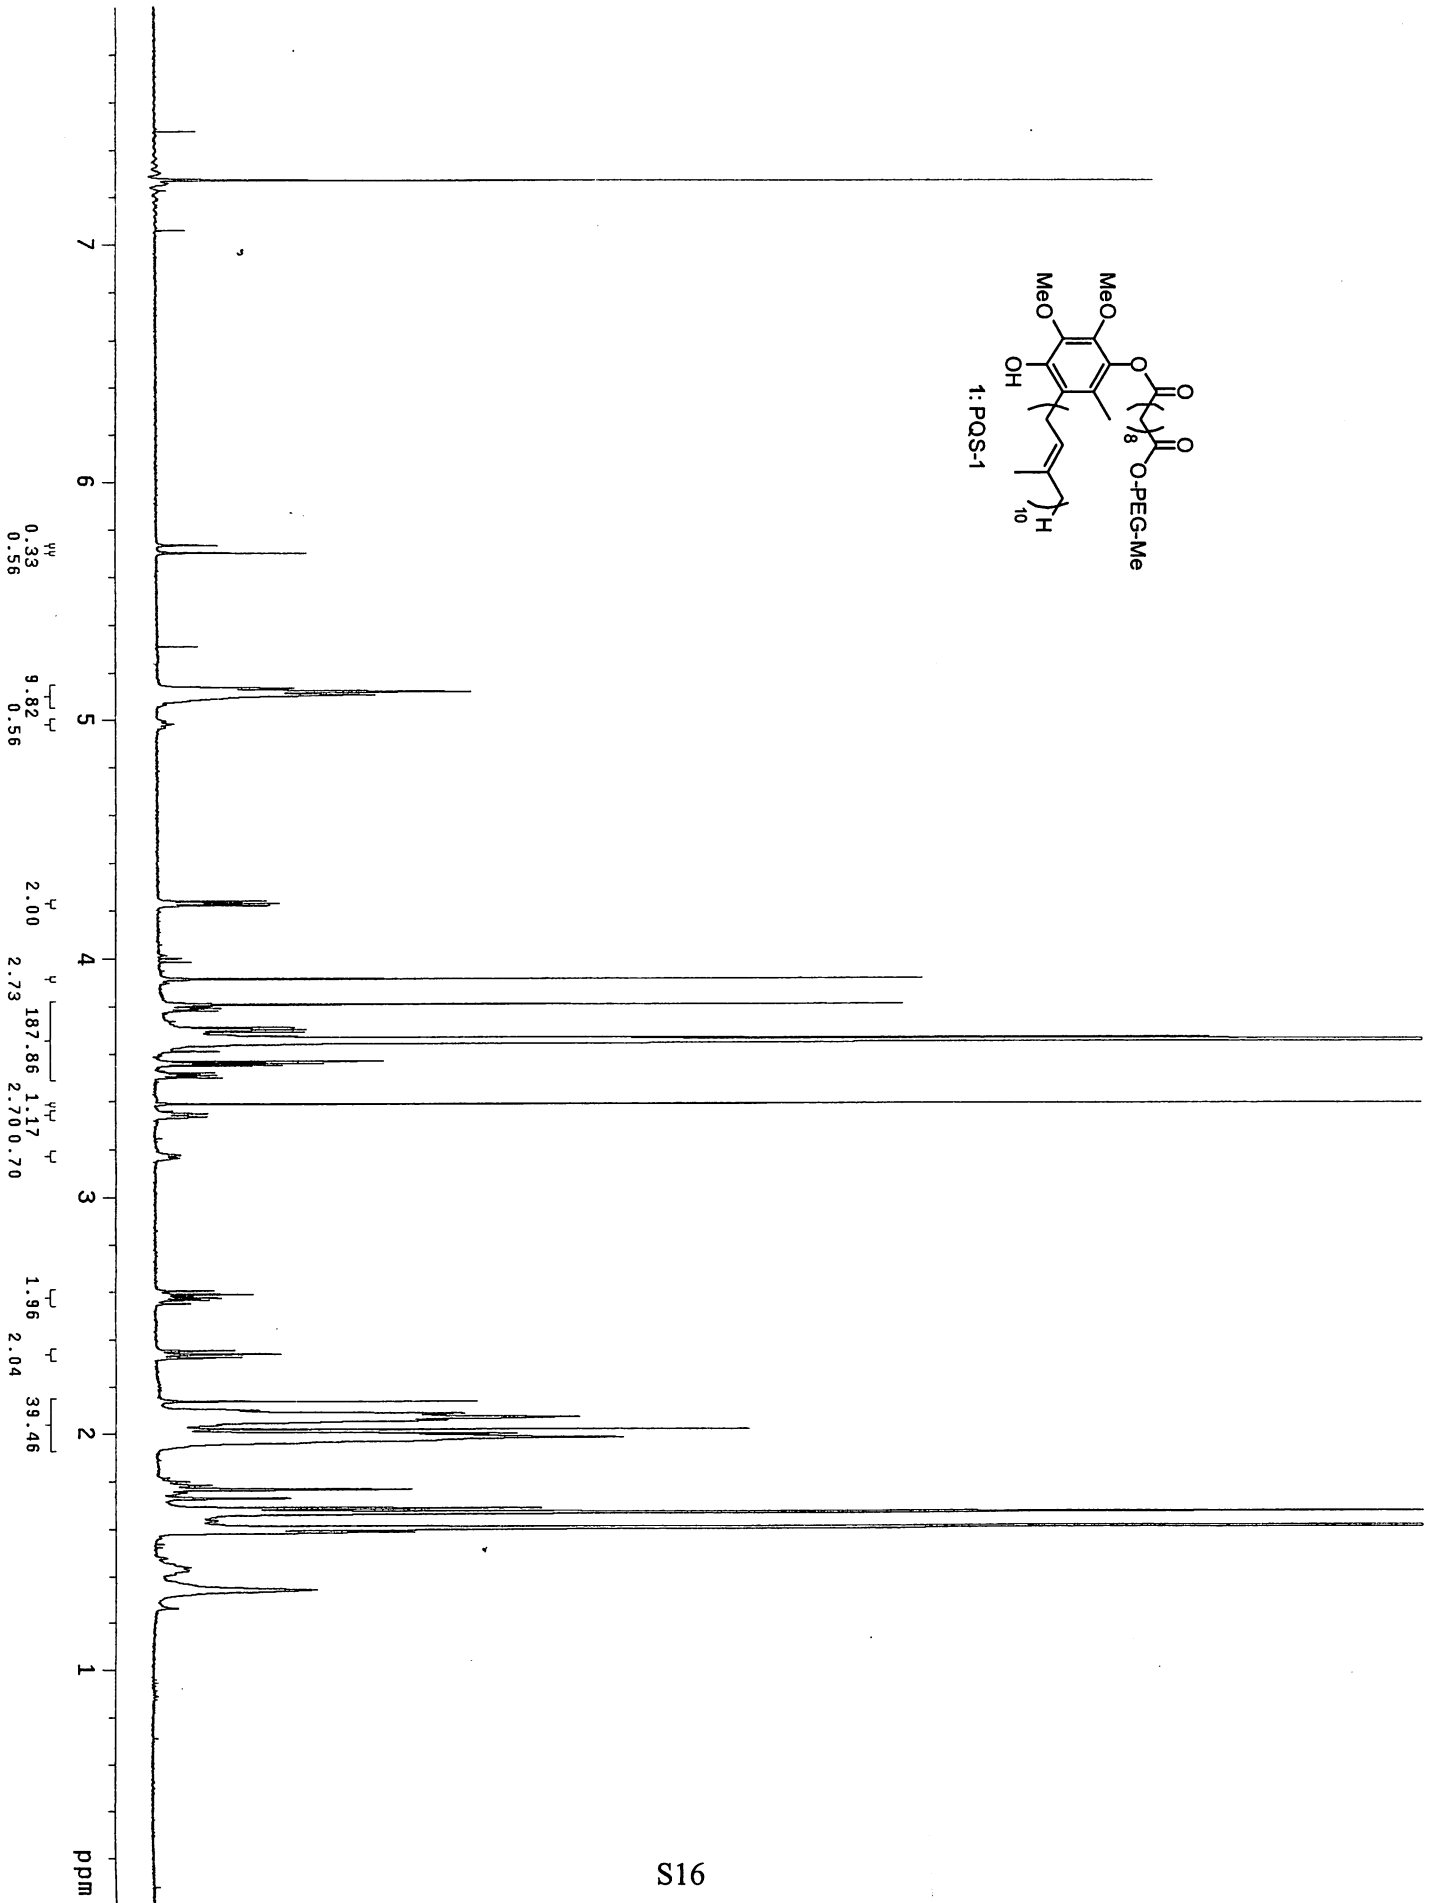



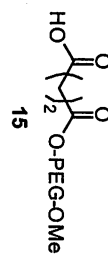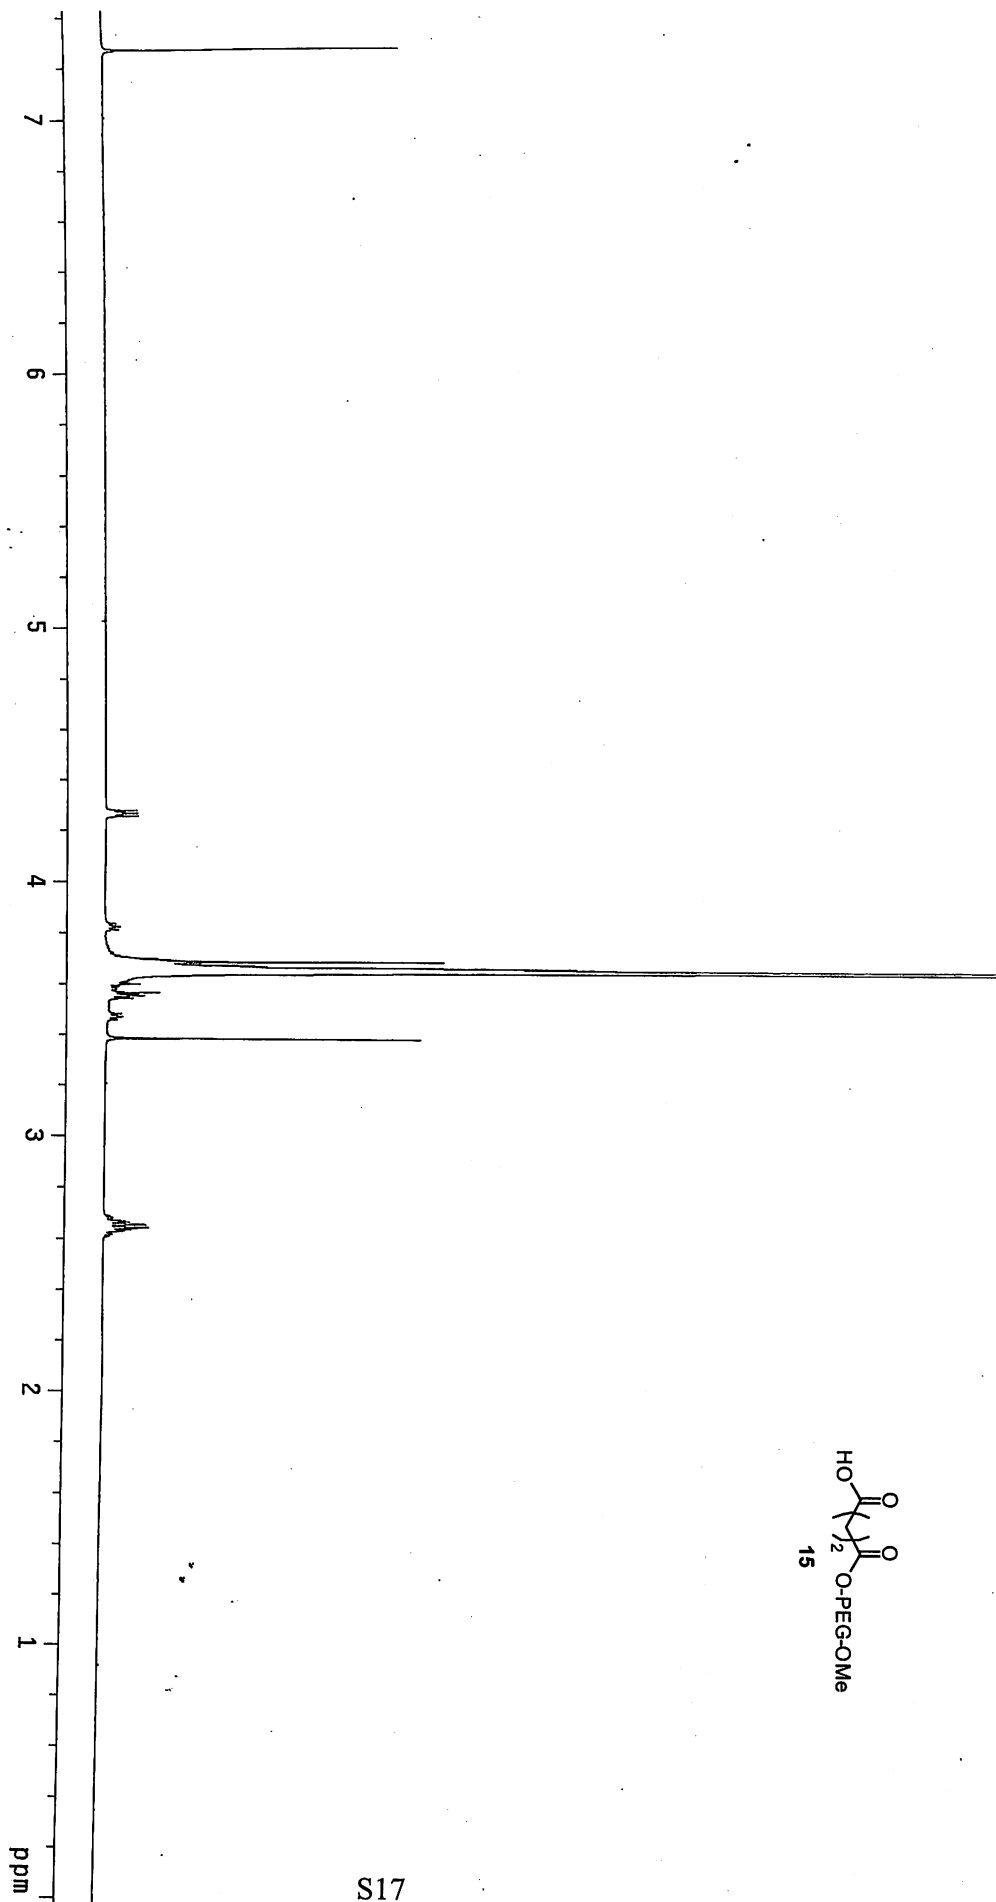

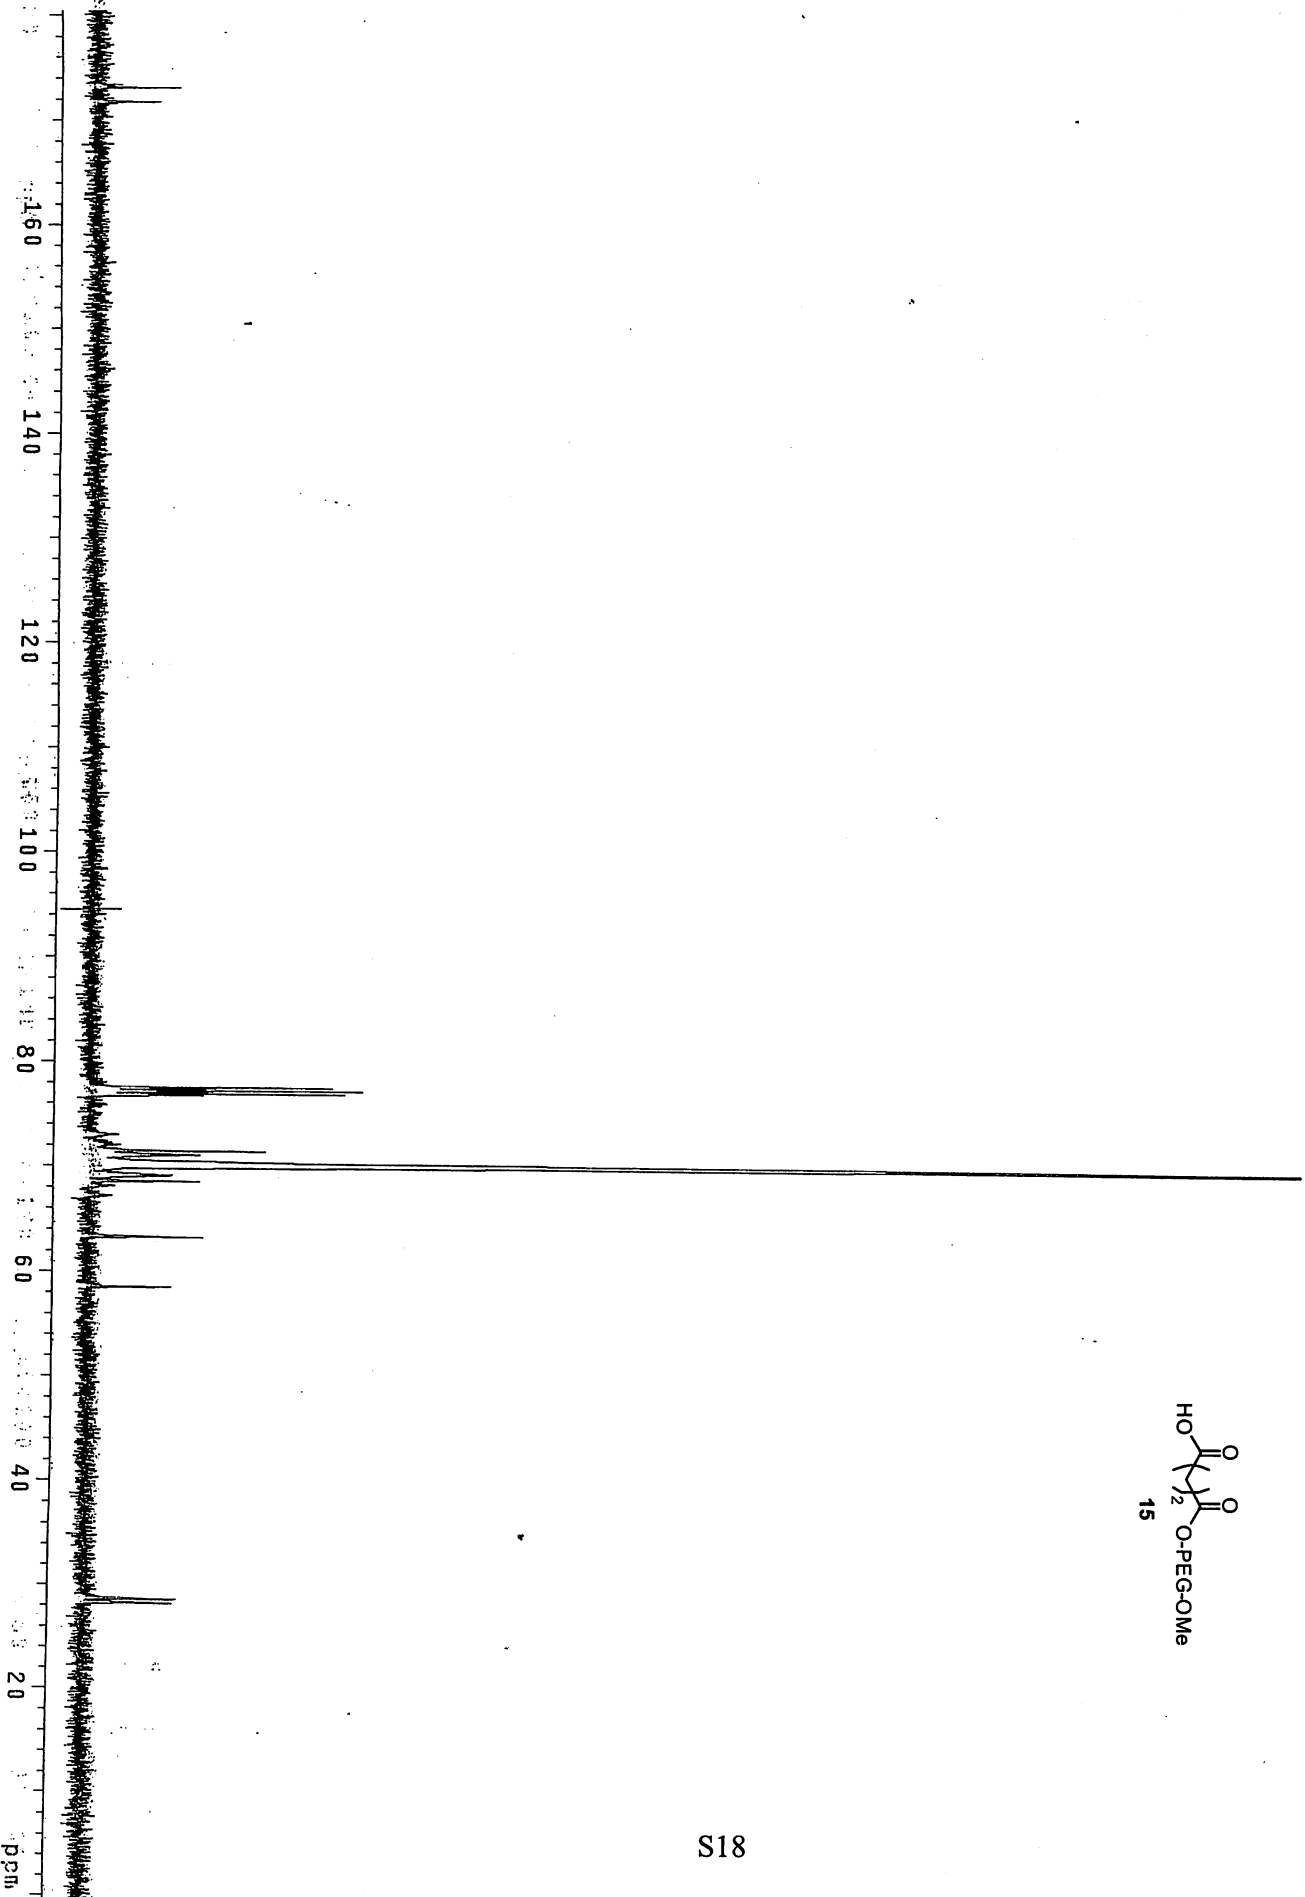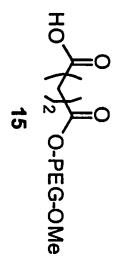

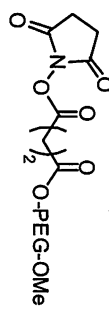

16

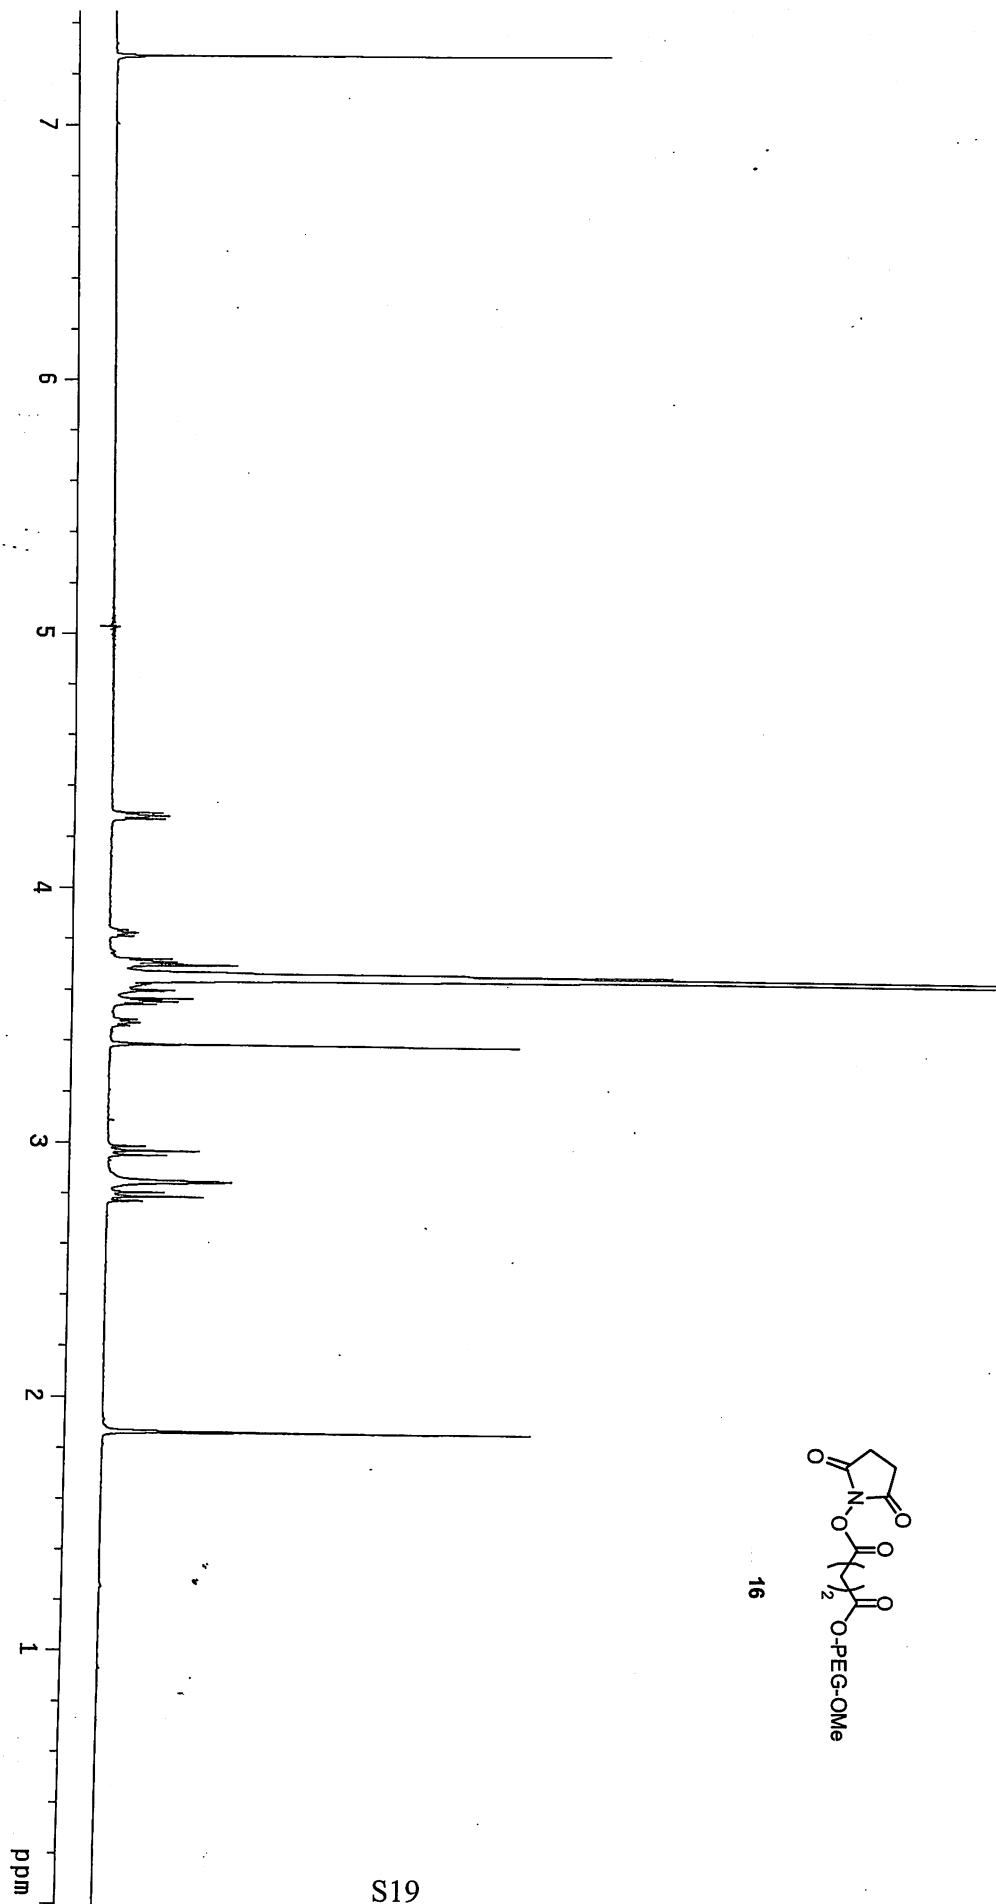

S19

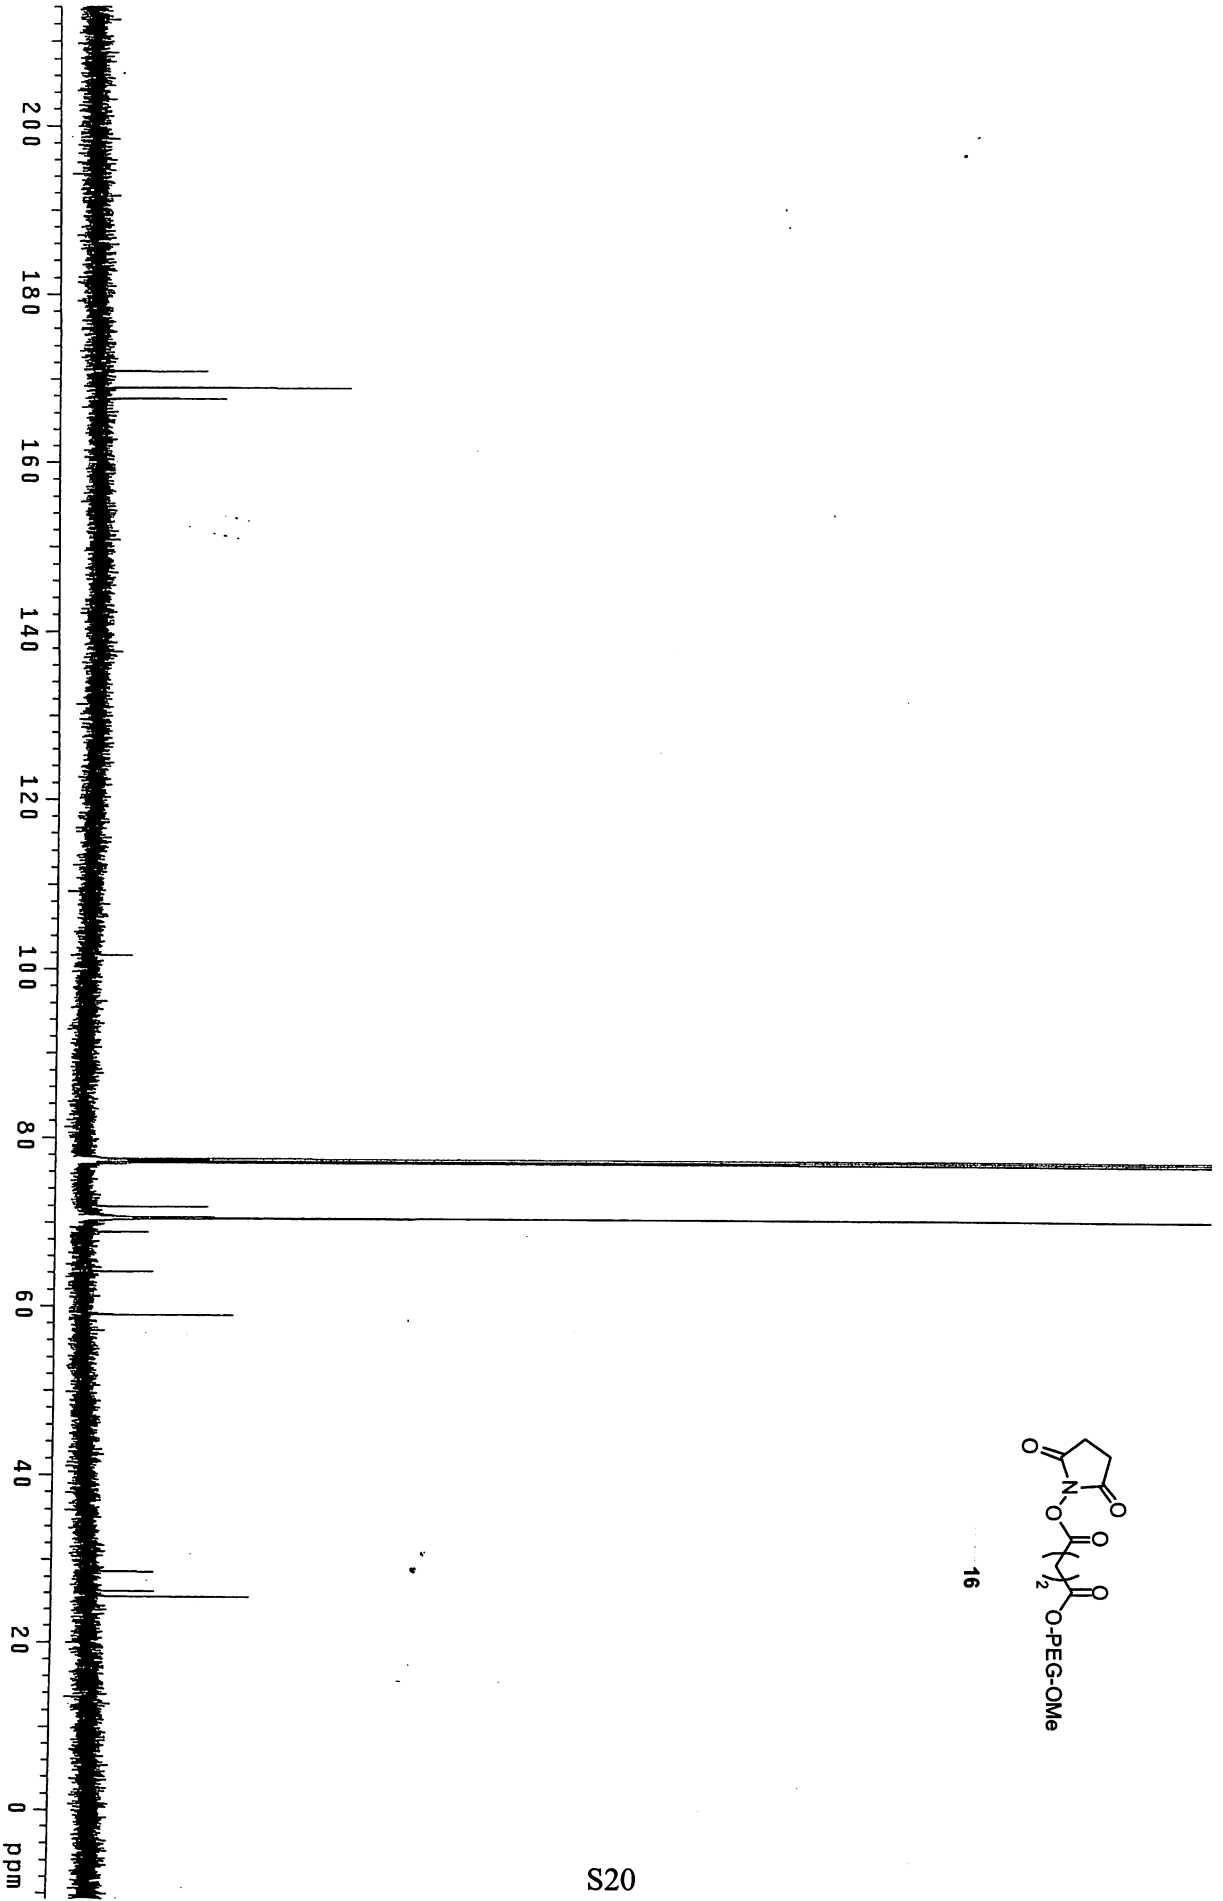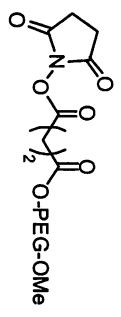

16

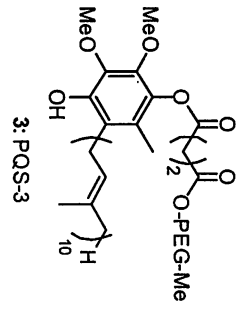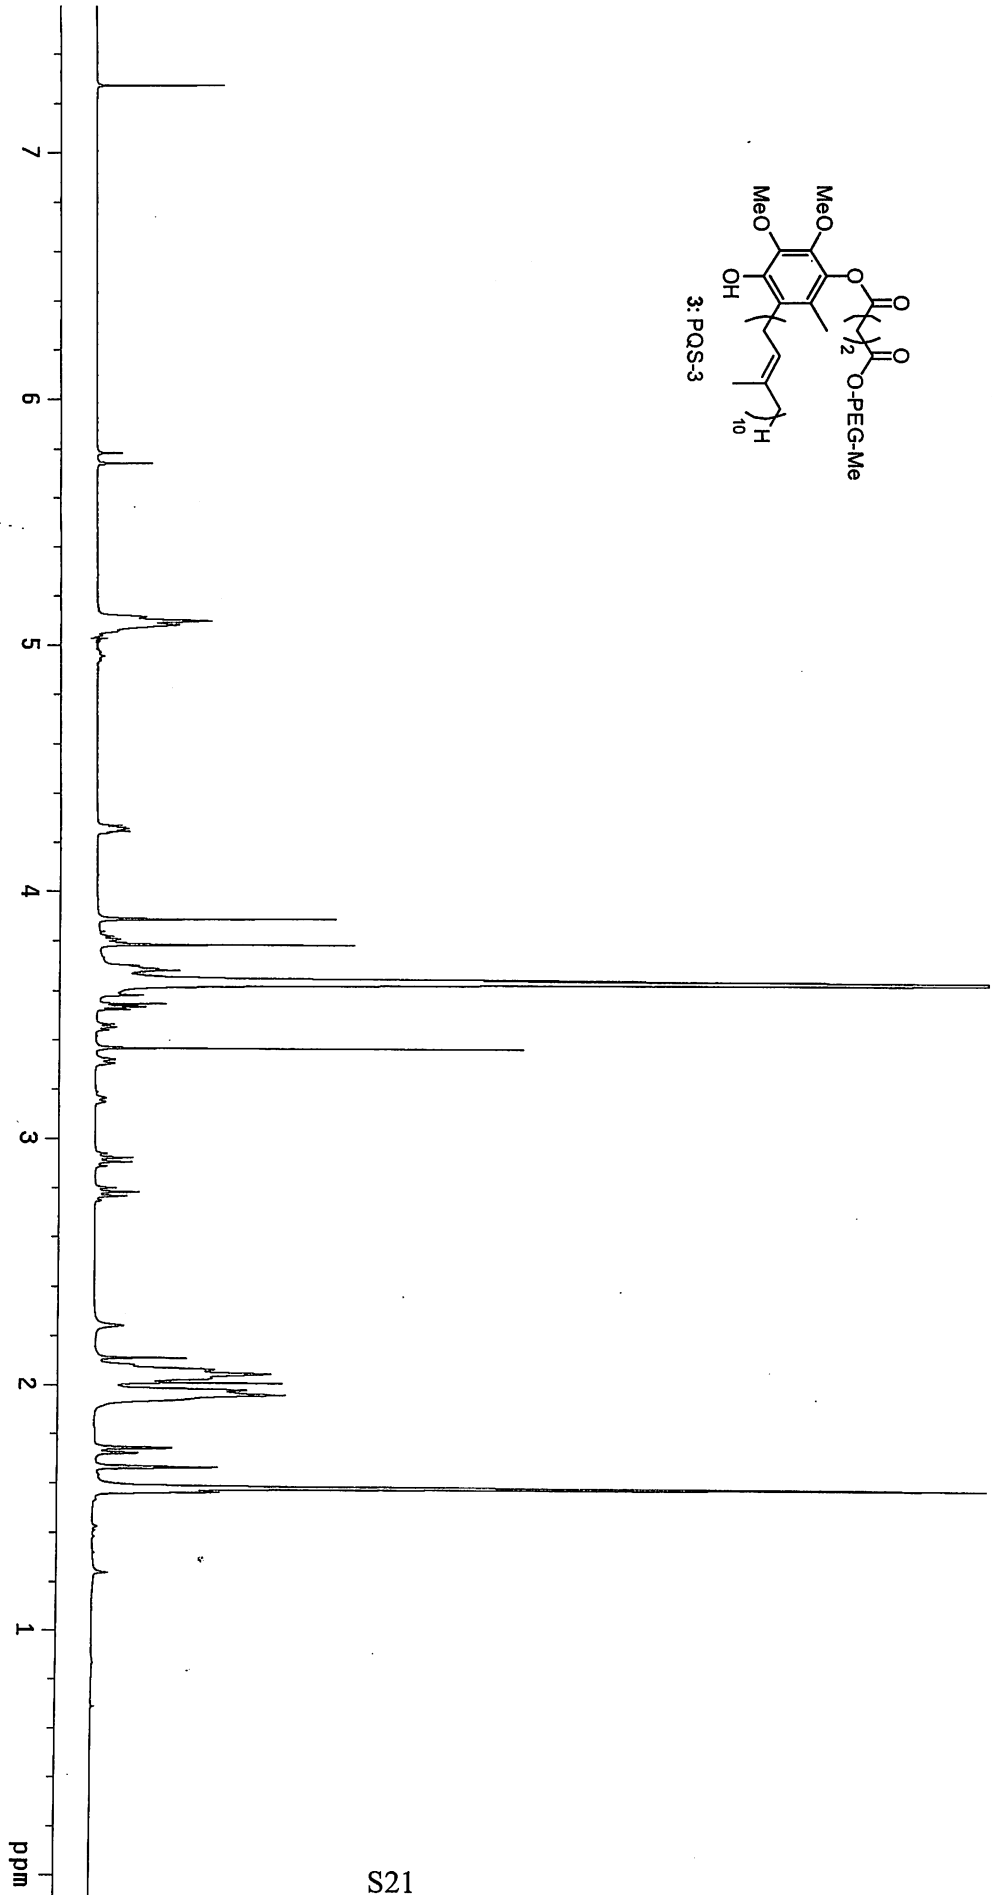

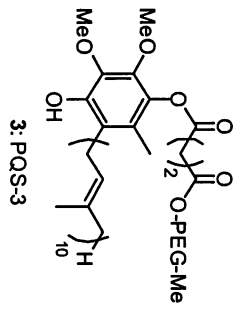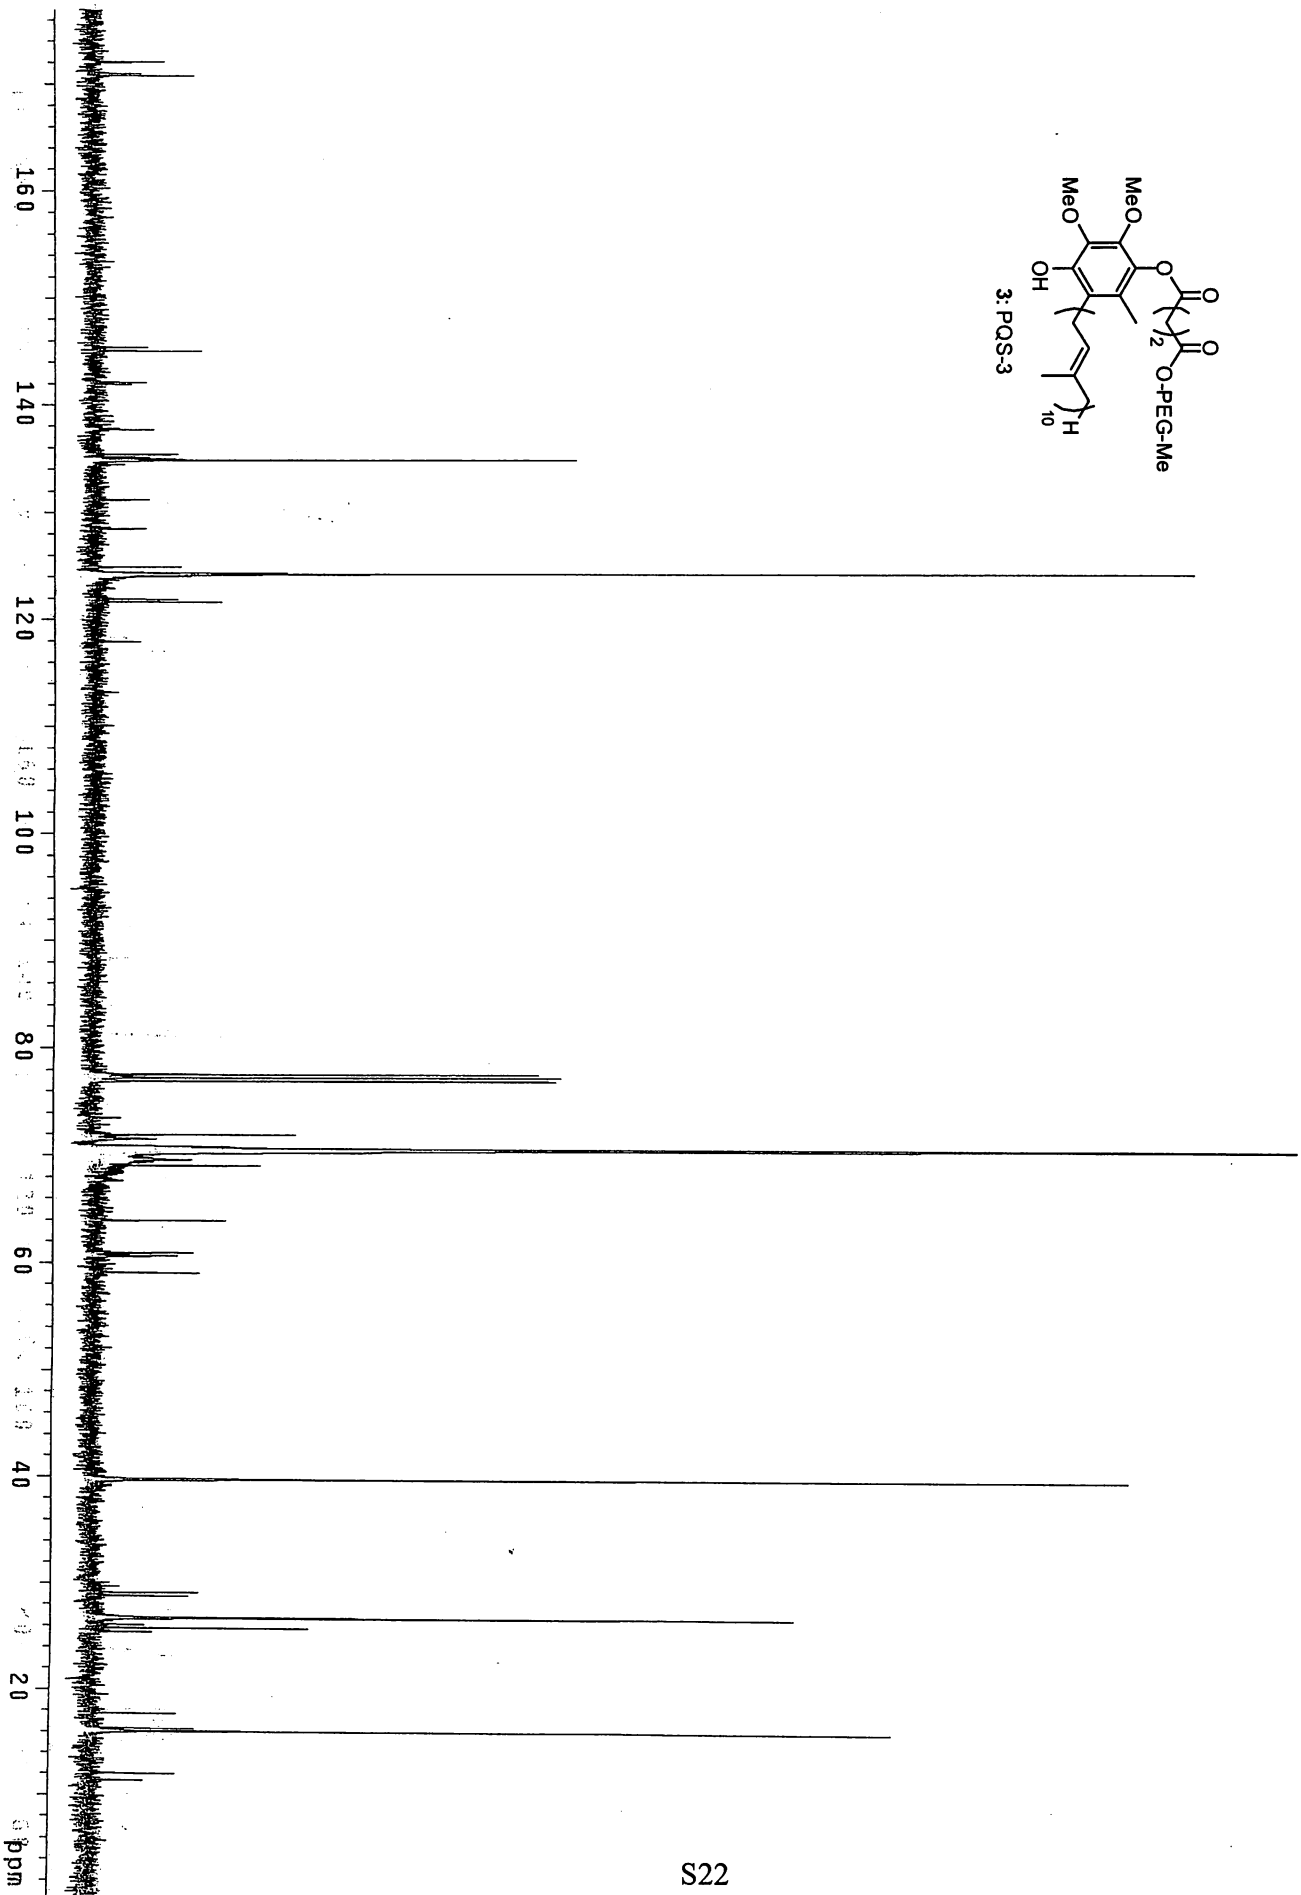

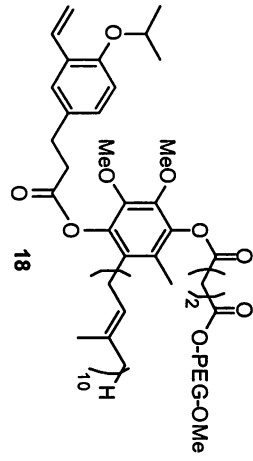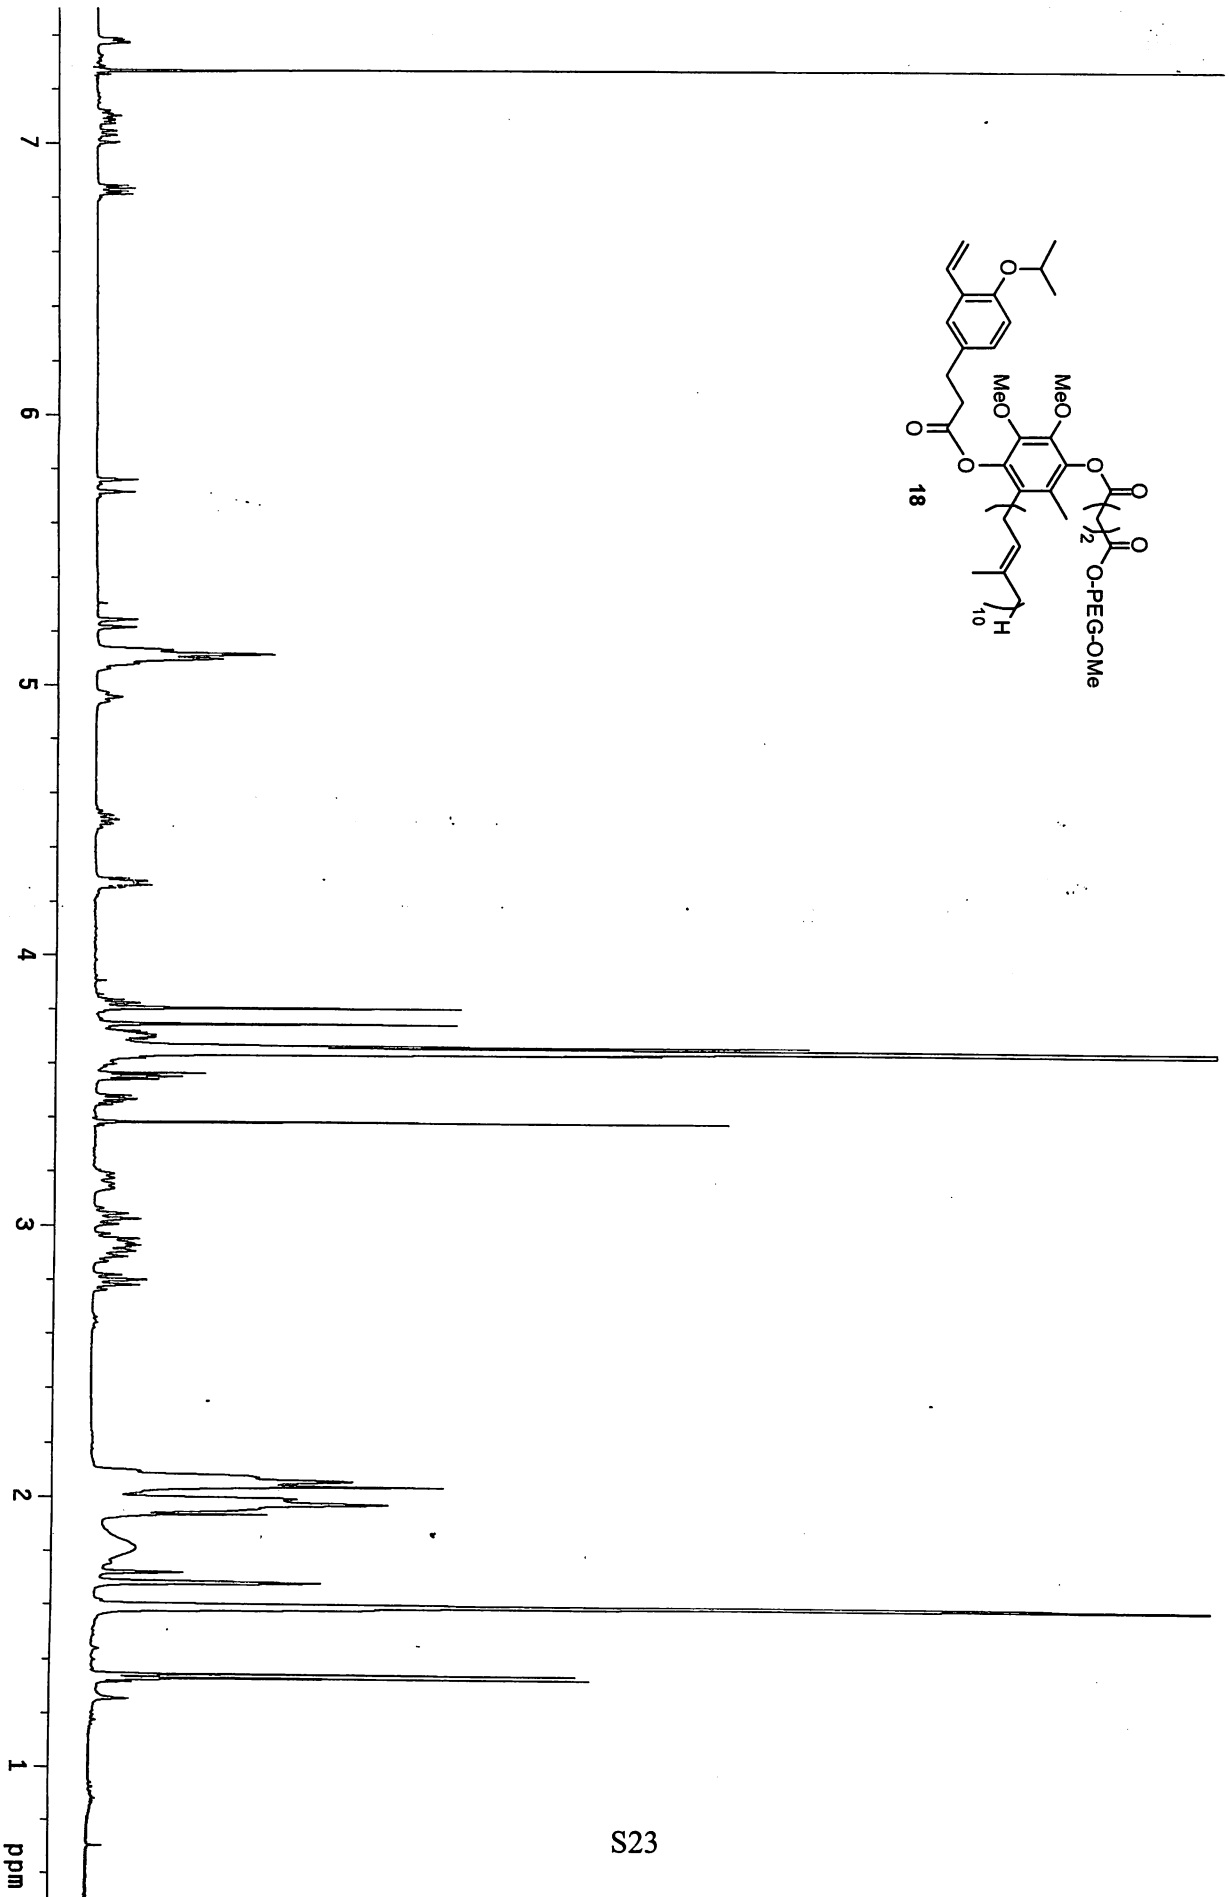

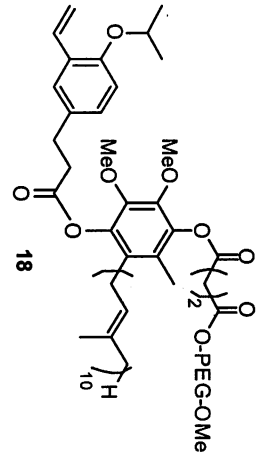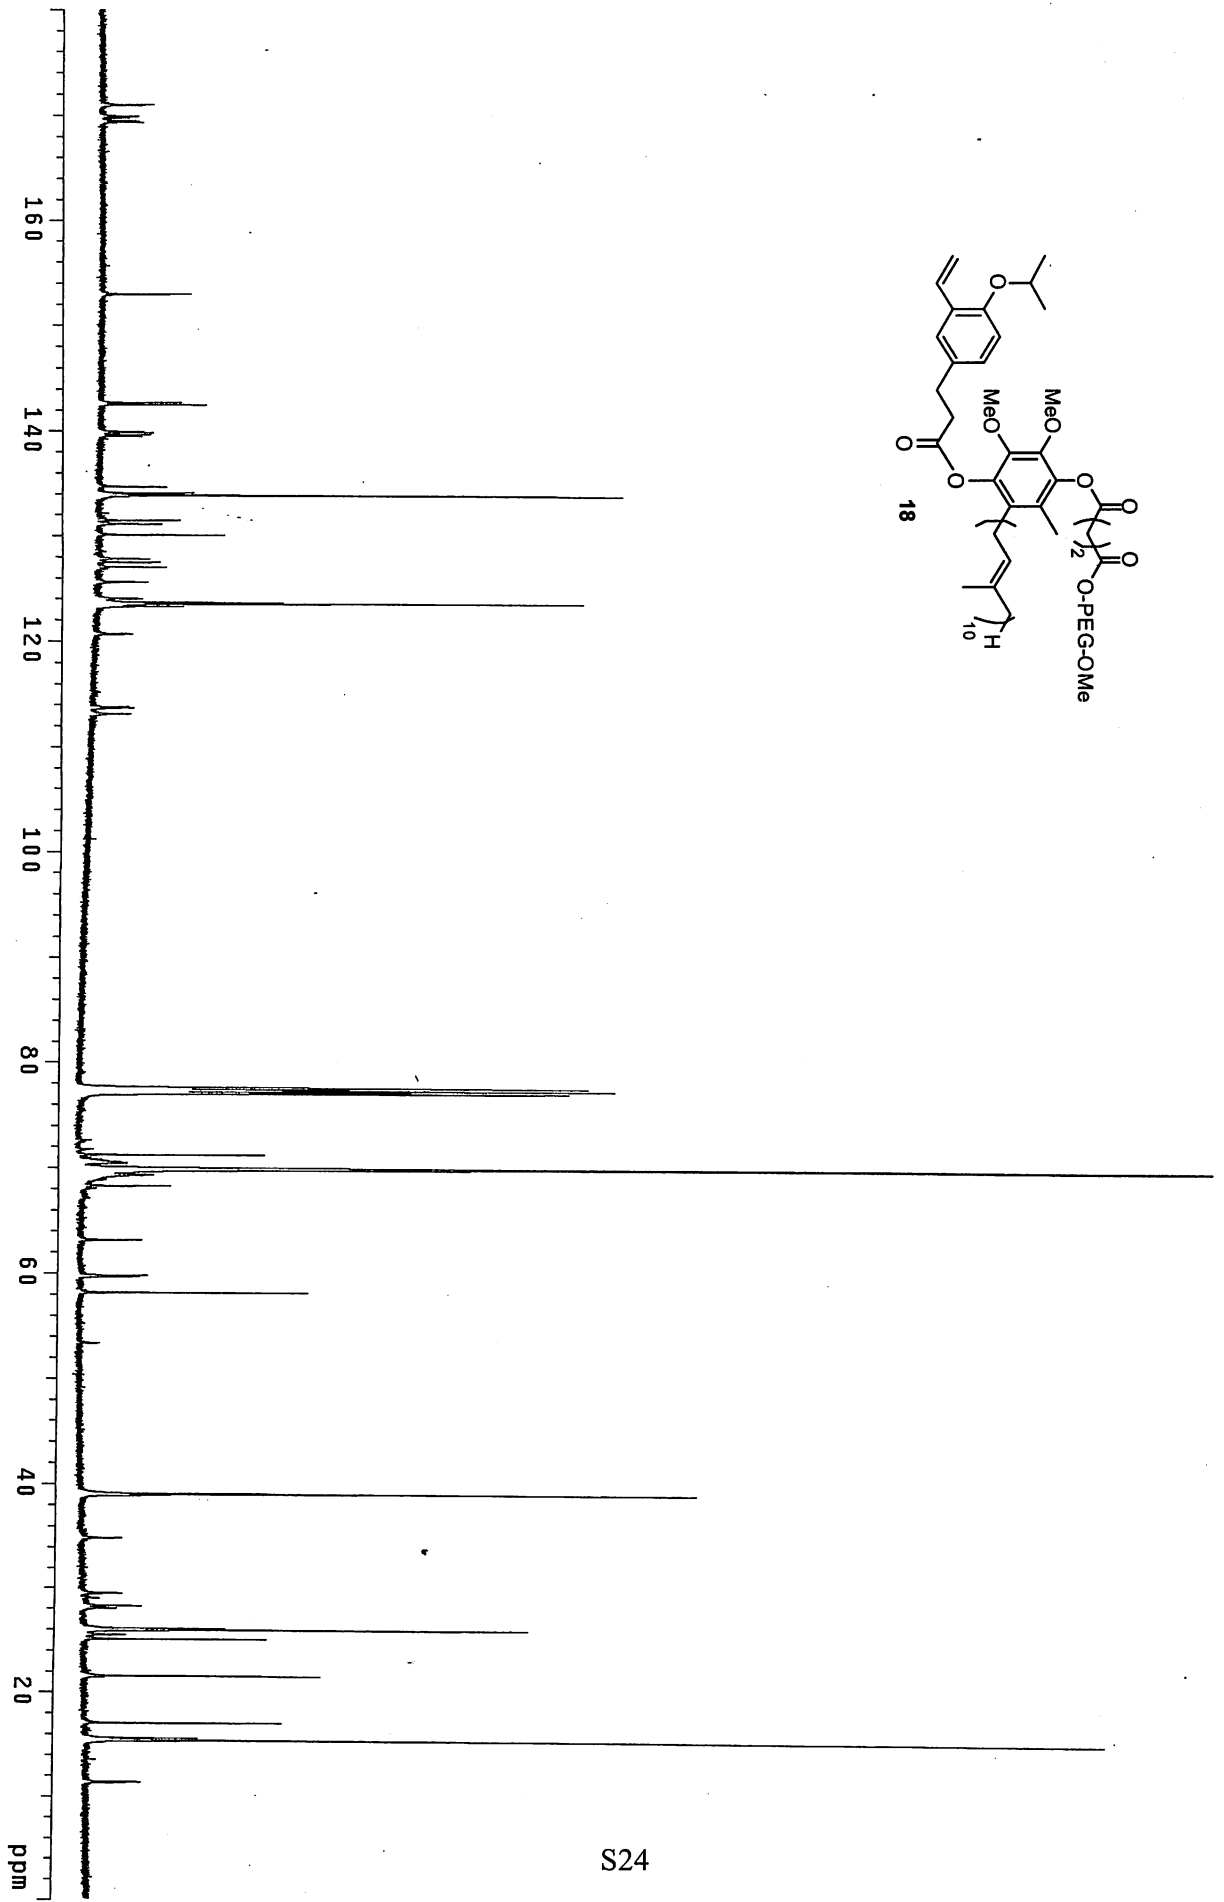



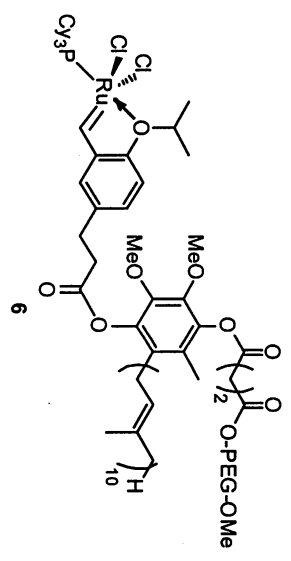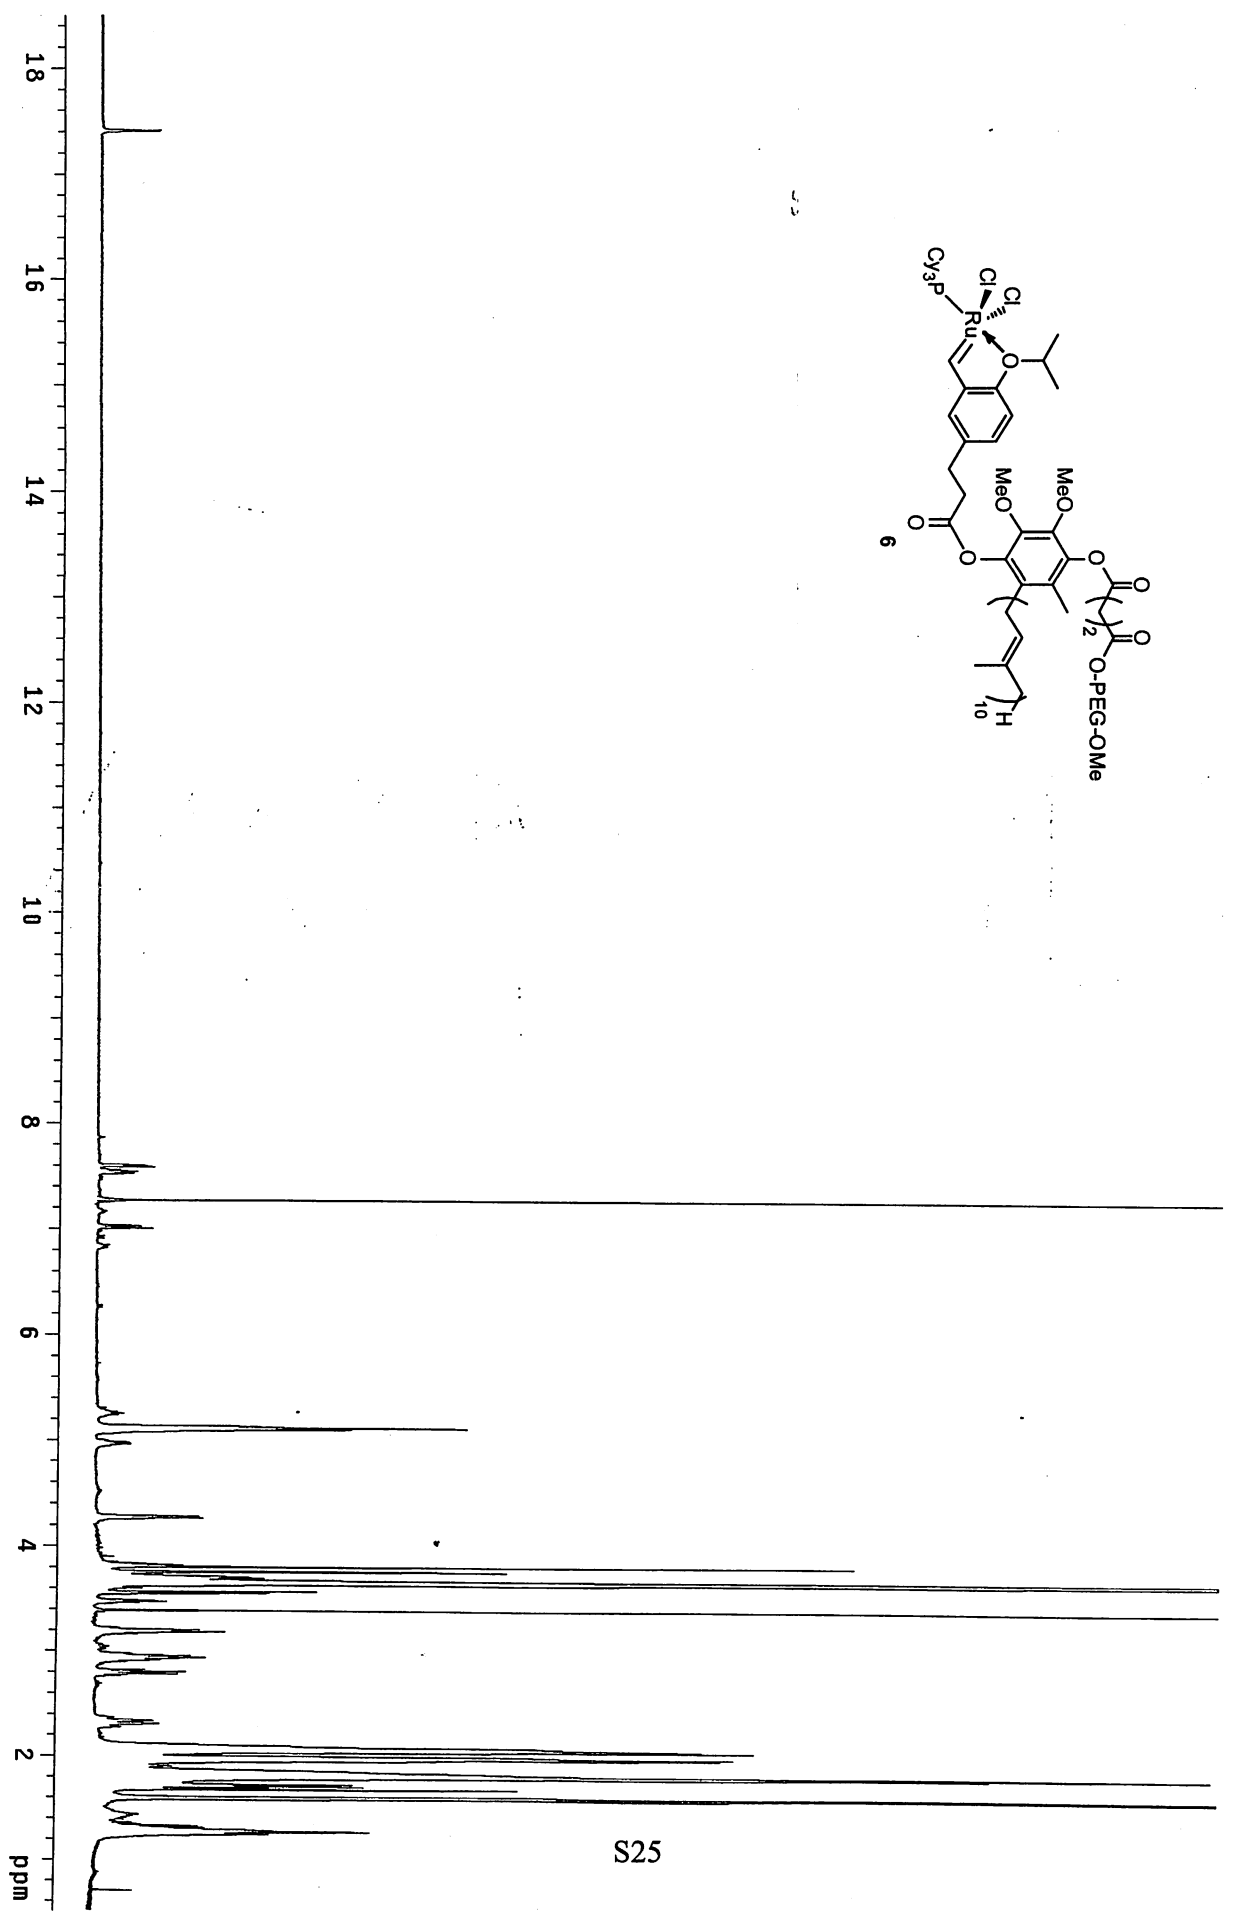

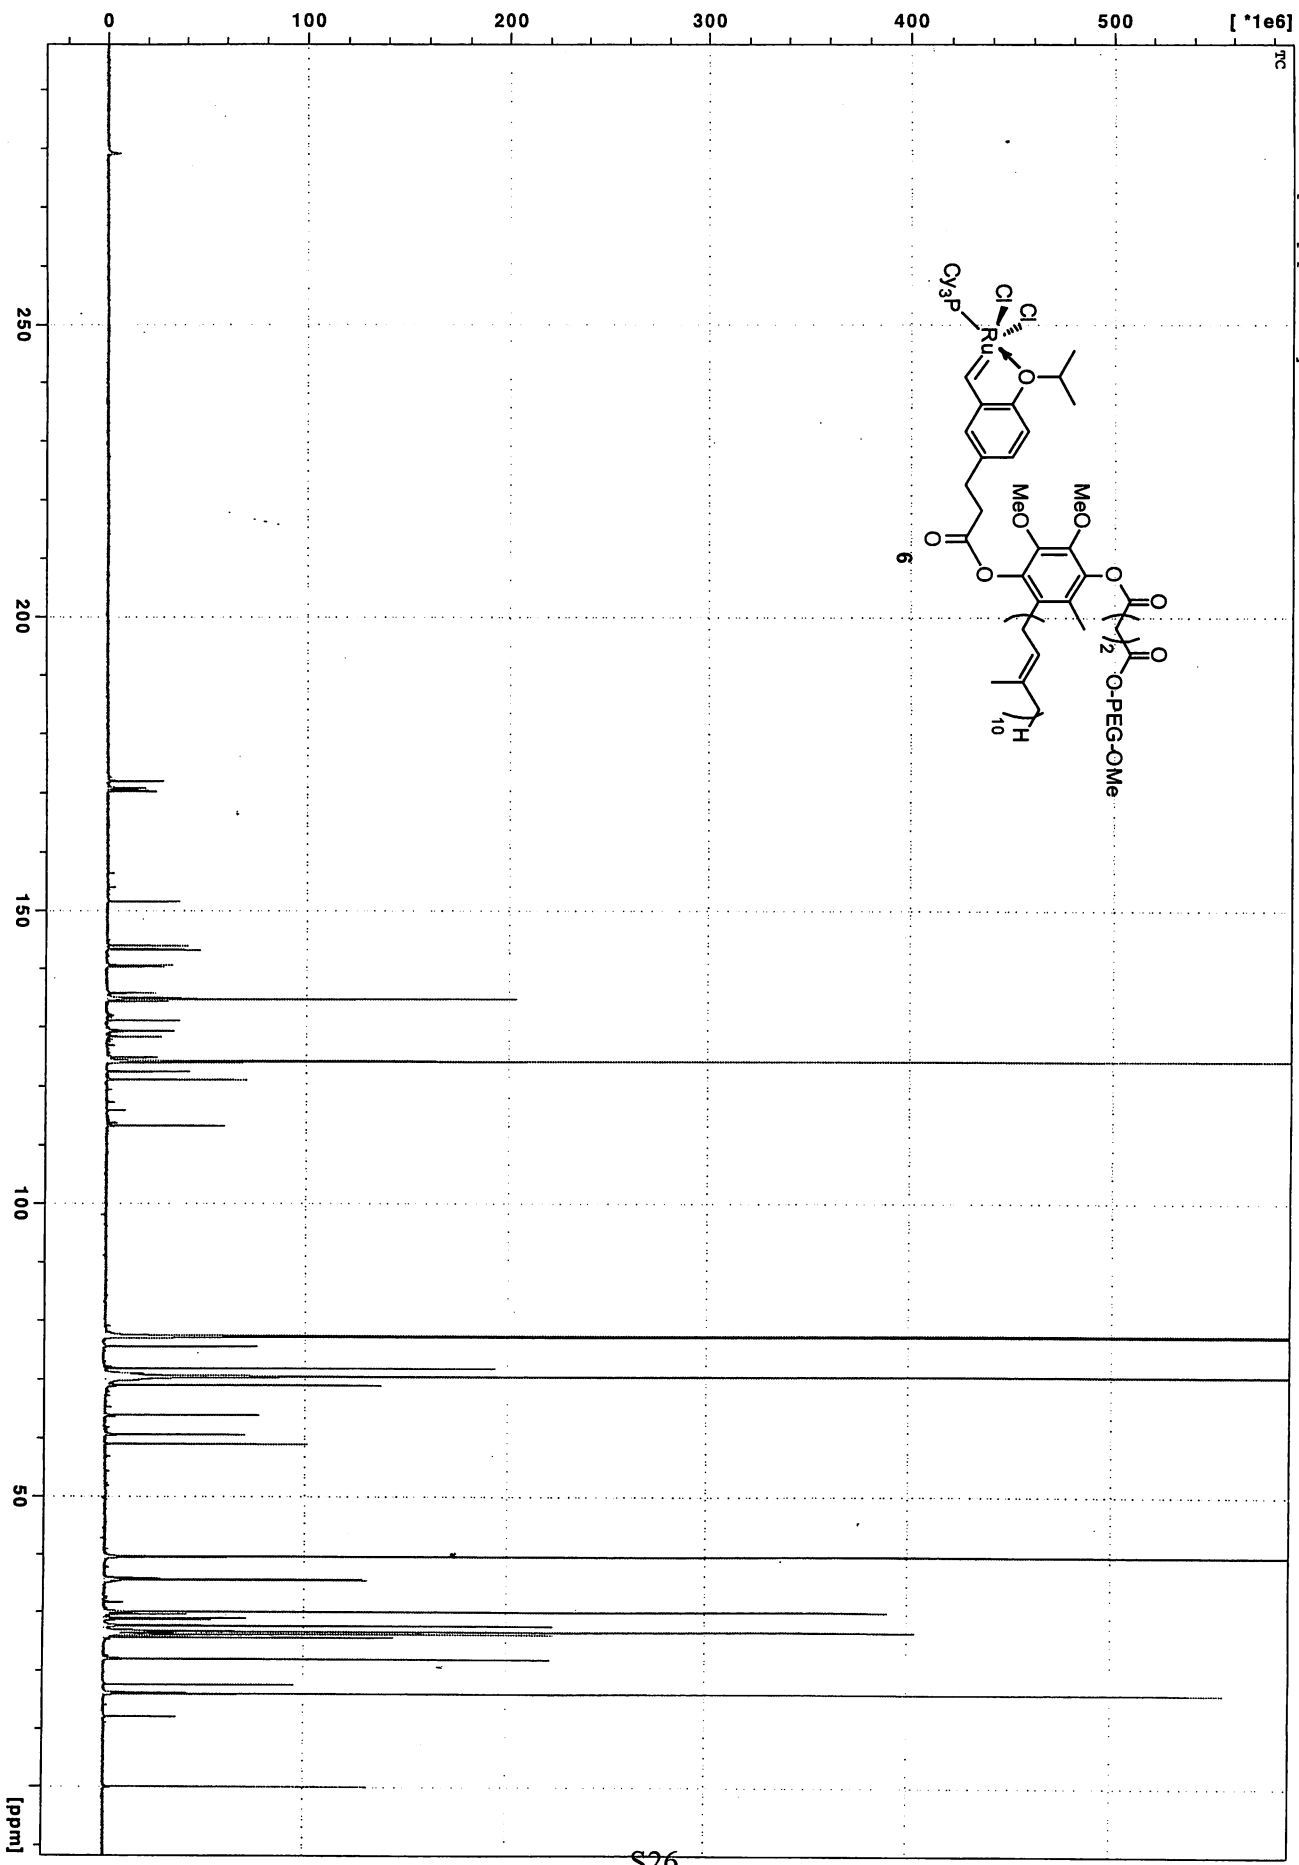

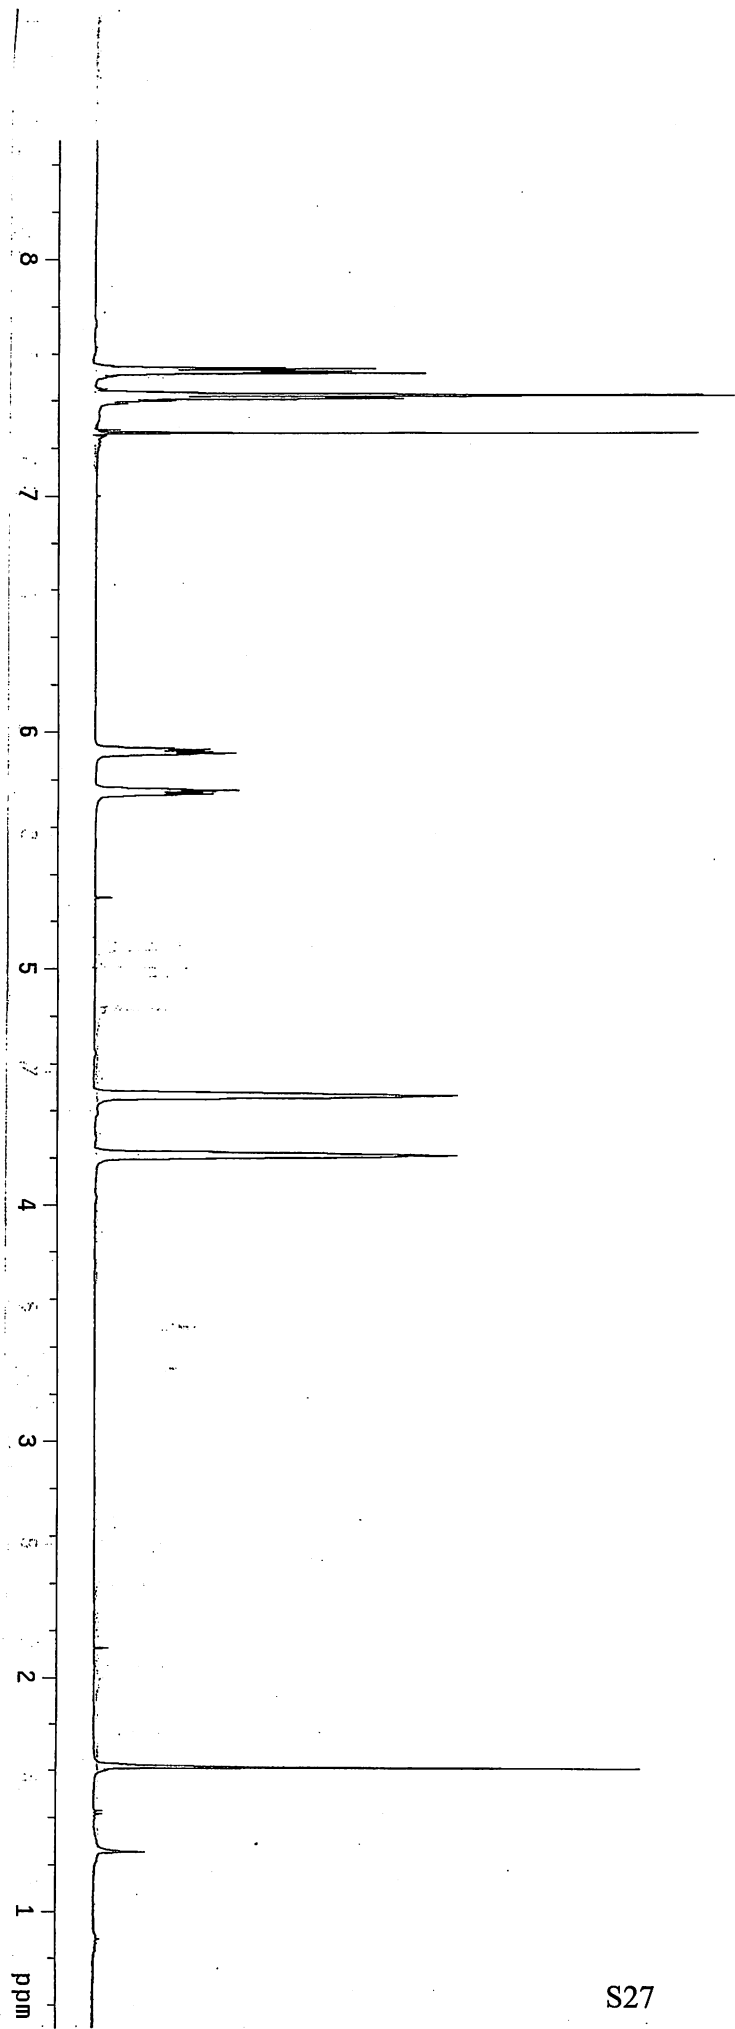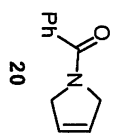

Supplement: NIHMS363860-supplement-1_si_001.pdf [file NIHMS363860-supplement-1_si_001.pdf]
